# Supplementary material for: Styxl2 regulates de novo sarcomere assembly by binding to non-muscle myosin IIs and promoting their degradation
Source: eLife journal article supplement (doi:10.7554/elife.87434), 2023-05-05
Supplement: fig4-figsupp1-data3 [file F004440_dat_rf_Ctrl114_Dox115_Quantification.xlsx]

## Sheet: F004440_dat_rf_Ctrl114_Dox115_Q
1	20171030 CXW (D:\Haidi\20171030 CXW_itraq.par), submitted from Daemon on X-RAYLAB
MS data file	C:\Xcalibur\Data\WQ\20171028_WZG_Ctrl114_DOX115.raw
Database	SwissProt 2017_08
Taxonomy	Mus musculus (house mouse) (16,922 sequences)
Timestamp	30 Oct 2017 at 04:45:15 GMT
Type of search	MS/MS Ion Search
Quantitation	iTRAQ 4plex (Applied Biosystems iTRAQ(TM) 4-plex)
Enzyme	Trypsin
Fixed modifications	Carbamidomethyl (C),iTRAQ4plex (N-term),iTRAQ4plex (K)
Variable modifications	Acetyl (N-term),Oxidation (M),iTRAQ4plex (Y)
Mass values	Monoisotopic
Protein mass	Unrestricted
Peptide mass tolerance	15 ppm
Fragment mass tolerance	25 mmu
Max missed cleavages	2
Instrument type	ESI-FTICR
Number of queries	44838
Significance threshold p<	0.018951
Max. number of families	AUTO
Ions score or expect cut-off	0
Preferred taxonomy	All entries
Show Percolator scores?	no
Quantitation parameters:
Protein ratio type	median
Normalisation	none
Min. precursor charge	1
Outlier removal	auto
Min. number of peptides	1
Peptide threshold	at least homology
Unique peptides only?	no
Number of peptides (115/114)	115/114	p-value (114/115)	Number of peptides (114/115)	114/115	Family	Member	Database	Accession	Score	Mass	Num. of matches	Num. of significant matches	Num. of sequences	Num. of significant sequences	emPAI	Description
85	1.291	---	85	0.774	1	1	SwissProt	PYC_MOUSE	2727	138846	138	90	43	36	2.6	Pyruvate carboxylase, mitochondrial OS=Mus musculus GN=Pc PE=1 SV=1
71	1.902	---	71	0.526	2	1	SwissProt	ACTB_MOUSE	2057	44934	95	72	21	17	7.61	Actin, cytoplasmic 1 OS=Mus musculus GN=Actb PE=1 SV=1
66	1.895	---	66	0.528	2	2	SwissProt	ACTG_MOUSE	2001	44990	88	67	19	16	6.84	Actin, cytoplasmic 2 OS=Mus musculus GN=Actg1 PE=1 SV=1
36	1.967	---	36	0.508	2	3	SwissProt	ACTA_MOUSE	873	45263	43	37	14	11	3.03	Actin, aortic smooth muscle OS=Mus musculus GN=Acta2 PE=1 SV=1
66	1.31	9.72E-07	66	0.763	3	1	SwissProt	PCCA_MOUSE	1985	87703	111	71	34	31	3.9	Propionyl-CoA carboxylase alpha chain, mitochondrial OS=Mus musculus GN=Pcca PE=1 SV=2
75	2.057	0	75	0.486	4	1	SwissProt	MYH9_MOUSE	1887	257114	110	76	56	42	1.17	Myosin-9 OS=Mus musculus GN=Myh9 PE=1 SV=4
12	2.285	1.24E-05	12	0.438	4	2	SwissProt	MYH10_MOUSE	414	258212	22	12	17	8	0.14	Myosin-10 OS=Mus musculus GN=Myh10 PE=1 SV=2
30	1.635	2.51E-10	30	0.612	5	1	SwissProt	H13_MOUSE	1158	31165	46	39	12	10	4.02	Histone H1.3 OS=Mus musculus GN=Hist1h1d PE=1 SV=2
34	1.685	---	34	0.593	5	2	SwissProt	H12_MOUSE	1037	29756	48	37	13	10	4.42	Histone H1.2 OS=Mus musculus GN=Hist1h1c PE=1 SV=2
28	1.715	---	28	0.583	5	3	SwissProt	H14_MOUSE	941	30898	39	32	12	10	3.45	Histone H1.4 OS=Mus musculus GN=Hist1h1e PE=1 SV=2
20	1.659	4.05E-06	20	0.603	5	4	SwissProt	H15_MOUSE	706	32073	28	22	10	7	2.7	Histone H1.5 OS=Mus musculus GN=Hist1h1b PE=1 SV=2
12	1.687	0.001186	12	0.593	5	5	SwissProt	H11_MOUSE	472	30274	17	14	8	7	1.63	Histone H1.1 OS=Mus musculus GN=Hist1h1a PE=1 SV=2
24	3.65	1.36E-07	24	0.274	6	1	SwissProt	DUS27_MOUSE	973	138953	51	33	28	21	0.9	Inactive dual specificity phosphatase 27 OS=Mus musculus GN=Dusp27 PE=1 SV=1
37	1.23	0.01566	37	0.813	7	1	SwissProt	MCCA_MOUSE	928	86177	54	39	25	21	2.09	Methylcrotonoyl-CoA carboxylase subunit alpha, mitochondrial OS=Mus musculus GN=Mccc1 PE=1 SV=2
27	1.443	7.23E-06	27	0.693	8	1	SwissProt	GNL3_MOUSE	822	70743	40	28	19	16	1.6	Guanine nucleotide-binding protein-like 3 OS=Mus musculus GN=Gnl3 PE=1 SV=2
27	1.88	6.66E-07	27	0.532	9	1	SwissProt	KPYM_MOUSE	821	63854	48	30	21	16	2.08	Pyruvate kinase PKM OS=Mus musculus GN=Pkm PE=1 SV=4
21	1.642	3.59E-11	21	0.609	10	1	SwissProt	H10_MOUSE	747	28918	31	22	7	5	2.18	Histone H1.0 OS=Mus musculus GN=H1f0 PE=2 SV=4
21	1.765	1.04E-08	21	0.567	11	1	SwissProt	MBB1A_MOUSE	677	168273	33	21	19	16	0.53	Myb-binding protein 1A OS=Mus musculus GN=Mybbp1a PE=1 SV=2
27	2.41	2.51E-13	27	0.415	12	1	SwissProt	VIME_MOUSE	657	57026	42	29	25	19	3.72	Vimentin OS=Mus musculus GN=Vim PE=1 SV=3
18	1.121	0.3552	18	0.892	12	2	SwissProt	K2C6A_MOUSE	413	64252	28	19	12	9	0.81	Keratin, type II cytoskeletal 6A OS=Mus musculus GN=Krt6a PE=1 SV=3
17	1.068	0.4166	17	0.936	12	3	SwissProt	K2C5_MOUSE	374	66136	28	19	13	9	0.78	Keratin, type II cytoskeletal 5 OS=Mus musculus GN=Krt5 PE=1 SV=1
7	1.045	0.5853	7	0.957	12	4	SwissProt	K2C1_MOUSE	225	71122	15	8	5	4	0.27	Keratin, type II cytoskeletal 1 OS=Mus musculus GN=Krt1 PE=1 SV=4
9	2.325	8.62E-07	9	0.43	12	5	SwissProt	DESM_MOUSE	184	56692	13	9	9	6	0.56	Desmin OS=Mus musculus GN=Des PE=1 SV=3
11	1.237	0.1229	11	0.809	12	6	SwissProt	K2C79_MOUSE	175	62557	16	11	7	5	0.4	Keratin, type II cytoskeletal 79 OS=Mus musculus GN=Krt79 PE=1 SV=2
9	0.964	0.7651	9	1.038	12	7	SwissProt	K2C1B_MOUSE	156	65558	15	9	6	5	0.38	Keratin, type II cytoskeletal 1b OS=Mus musculus GN=Krt77 PE=1 SV=1
9	1.39	0.2593	9	0.72	12	8	SwissProt	K22E_MOUSE	124	75947	17	9	8	6	0.4	Keratin, type II cytoskeletal 2 epidermal OS=Mus musculus GN=Krt2 PE=1 SV=1
6	1.41	0.3224	6	0.709	12	9	SwissProt	K22O_MOUSE	103	68507	12	6	7	5	0.36	Keratin, type II cytoskeletal 2 oral OS=Mus musculus GN=Krt76 PE=1 SV=1
16	1.935	1.55E-07	16	0.517	13	1	SwissProt	PROF1_MOUSE	603	16560	26	18	9	8	11.26	Profilin-1 OS=Mus musculus GN=Pfn1 PE=1 SV=2
19	1.677	8.55E-07	19	0.596	14	1	SwissProt	GRP75_MOUSE	436	81482	38	21	23	13	1.07	Stress-70 protein, mitochondrial OS=Mus musculus GN=Hspa9 PE=1 SV=3
7	2.697	0.0002172	7	0.371	14	2	SwissProt	HSP7C_MOUSE	178	78981	22	8	17	7	0.45	Heat shock cognate 71 kDa protein OS=Mus musculus GN=Hspa8 PE=1 SV=1
13	1.662	0.001795	13	0.602	15	1	SwissProt	TBA1A_MOUSE	397	53670	22	14	12	8	1.03	Tubulin alpha-1A chain OS=Mus musculus GN=Tuba1a PE=1 SV=1
10	1.196	---	10	0.836	16	1	SwissProt	SLIT2_MOUSE	347	186533	16	10	12	6	0.15	Slit homolog 2 protein OS=Mus musculus GN=Slit2 PE=2 SV=2
9	1.614	0.04963	9	0.619	17	1	SwissProt	RL24_MOUSE	332	21917	10	9	6	5	2.14	60S ribosomal protein L24 OS=Mus musculus GN=Rpl24 PE=1 SV=2
10	1.835	0.000426	10	0.545	18	1	SwissProt	FAS_MOUSE	329	289836	25	10	20	9	0.14	Fatty acid synthase OS=Mus musculus GN=Fasn PE=1 SV=2
22	2.01	9.77E-10	22	0.498	19	1	SwissProt	DYHC1_MOUSE	312	577389	62	22	51	19	0.15	Cytoplasmic dynein 1 heavy chain 1 OS=Mus musculus GN=Dync1h1 PE=1 SV=2
9	1.692	0.009657	9	0.591	20	1	SwissProt	G3P_MOUSE	297	39963	14	9	6	4	0.69	Glyceraldehyde-3-phosphate dehydrogenase OS=Mus musculus GN=Gapdh PE=1 SV=2
10	1.556	2.26E-05	10	0.643	21	1	SwissProt	AP3D1_MOUSE	291	152909	20	11	14	7	0.21	AP-3 complex subunit delta-1 OS=Mus musculus GN=Ap3d1 PE=1 SV=1
10	1.66	---	10	0.602	22	1	SwissProt	RL1D1_MOUSE	288	60417	16	10	11	7	0.63	Ribosomal L1 domain-containing protein 1 OS=Mus musculus GN=Rsl1d1 PE=1 SV=1
7	1.401	0.0124	7	0.714	23	1	SwissProt	RS23_MOUSE	281	18995	8	8	5	5	1.99	40S ribosomal protein S23 OS=Mus musculus GN=Rps23 PE=1 SV=3
12	1.746	1.61E-07	12	0.573	24	1	SwissProt	MYOF_MOUSE	264	255812	33	13	24	10	0.18	Myoferlin OS=Mus musculus GN=Myof PE=1 SV=2
13	1.474	0.0007086	13	0.678	25	1	SwissProt	RS8_MOUSE	262	29087	22	13	7	6	1.37	40S ribosomal protein S8 OS=Mus musculus GN=Rps8 PE=1 SV=2
8	1.358	0.002512	8	0.737	26	1	SwissProt	RL23A_MOUSE	260	22151	14	9	8	5	1.56	60S ribosomal protein L23a OS=Mus musculus GN=Rpl23a PE=1 SV=1
8	1.967	0.000235	8	0.508	27	1	SwissProt	SND1_MOUSE	253	111067	14	8	9	5	0.21	Staphylococcal nuclease domain-containing protein 1 OS=Mus musculus GN=Snd1 PE=1 SV=1
12	1.817	1.75E-05	12	0.55	28	1	SwissProt	SURF6_MOUSE	239	49826	16	12	11	9	1.14	Surfeit locus protein 6 OS=Mus musculus GN=Surf6 PE=1 SV=1
10	2.304	0.0002116	10	0.434	29	1	SwissProt	RL18A_MOUSE	234	23598	10	10	4	4	1.03	60S ribosomal protein L18a OS=Mus musculus GN=Rpl18a PE=1 SV=1
11	1.741	9.05E-06	11	0.574	30	1	SwissProt	FINC_MOUSE	233	287401	28	13	20	9	0.14	Fibronectin OS=Mus musculus GN=Fn1 PE=1 SV=4
10	1.343	0.001022	10	0.744	31	1	SwissProt	ALDH2_MOUSE	220	61482	20	11	12	9	0.85	Aldehyde dehydrogenase, mitochondrial OS=Mus musculus GN=Aldh2 PE=1 SV=1
7	1.972	2.45E-05	7	0.507	32	1	SwissProt	TBB4B_MOUSE	178	52561	26	10	13	8	0.9	Tubulin beta-4B chain OS=Mus musculus GN=Tubb4b PE=1 SV=1
7	1.872	0.008713	7	0.534	32	2	SwissProt	TBB3_MOUSE	117	53292	27	7	11	4	0.48	Tubulin beta-3 chain OS=Mus musculus GN=Tubb3 PE=1 SV=1
3	1.6	0.2177	3	0.625	32	3	SwissProt	TBB6_MOUSE	74	52964	23	4	11	4	0.37	Tubulin beta-6 chain OS=Mus musculus GN=Tubb6 PE=1 SV=1
9	1.785	0.001588	9	0.56	33	1	SwissProt	RS6_MOUSE	215	34166	14	10	7	6	1.09	40S ribosomal protein S6 OS=Mus musculus GN=Rps6 PE=1 SV=1
9	1.917	0.0002466	9	0.522	34	1	SwissProt	LEG1_MOUSE	213	16639	16	10	6	5	2.47	Galectin-1 OS=Mus musculus GN=Lgals1 PE=1 SV=3
9	2.847	0.00177	9	0.351	35	1	SwissProt	RL8_MOUSE	202	32126	17	10	11	7	1.5	60S ribosomal protein L8 OS=Mus musculus GN=Rpl8 PE=1 SV=2
11	1.269	0.07168	11	0.788	36	1	SwissProt	SON_MOUSE	202	282568	21	11	13	8	0.13	Protein SON OS=Mus musculus GN=Son PE=1 SV=2
7	1.317	0.0153	7	0.759	37	1	SwissProt	K1C10_MOUSE	202	61076	16	8	7	4	0.32	Keratin, type I cytoskeletal 10 OS=Mus musculus GN=Krt10 PE=1 SV=3
6	2.229	0.2406	6	0.449	37	2	SwissProt	K1C17_MOUSE	118	51732	10	6	7	4	0.5	Keratin, type I cytoskeletal 17 OS=Mus musculus GN=Krt17 PE=1 SV=3
3	1.107	0.7713	3	0.903	37	3	SwissProt	K1C16_MOUSE	103	54856	10	3	5	3	0.26	Keratin, type I cytoskeletal 16 OS=Mus musculus GN=Krt16 PE=1 SV=3
7	1.623	0.008331	7	0.616	38	1	SwissProt	SPB6_MOUSE	200	47669	12	7	6	5	0.56	Serpin B6 OS=Mus musculus GN=Serpinb6 PE=1 SV=1
3	2.151	0.01297	3	0.465	39	1	SwissProt	THIM_MOUSE	197	45862	6	3	4	2	0.2	3-ketoacyl-CoA thiolase, mitochondrial OS=Mus musculus GN=Acaa2 PE=1 SV=3
5	1.55	0.01875	5	0.645	40	1	SwissProt	CLIC1_MOUSE	196	29932	8	6	5	4	0.75	Chloride intracellular channel protein 1 OS=Mus musculus GN=Clic1 PE=1 SV=3
7	1.781	0.0001607	7	0.561	41	1	SwissProt	RL13_MOUSE	192	28094	11	8	7	6	1.45	60S ribosomal protein L13 OS=Mus musculus GN=Rpl13 PE=1 SV=3
4	1.812	0.08262	4	0.552	42	1	SwissProt	CAN2_MOUSE	190	86729	6	5	4	3	0.16	Calpain-2 catalytic subunit OS=Mus musculus GN=Capn2 PE=1 SV=4
11	2.392	---	11	0.418	43	1	SwissProt	ADT2_MOUSE	187	36741	17	11	9	8	1.5	ADP/ATP translocase 2 OS=Mus musculus GN=Slc25a5 PE=1 SV=3
7	3.022	---	7	0.331	43	2	SwissProt	ADT1_MOUSE	84	36570	13	7	8	7	1.24	ADP/ATP translocase 1 OS=Mus musculus GN=Slc25a4 PE=1 SV=4
9	1.862	0.002358	9	0.537	44	1	SwissProt	RL4_MOUSE	185	55623	15	10	8	7	0.7	60S ribosomal protein L4 OS=Mus musculus GN=Rpl4 PE=1 SV=3
6	1.445	0.03698	6	0.692	45	1	SwissProt	MYO1C_MOUSE	183	132522	13	6	10	5	0.17	Unconventional myosin-Ic OS=Mus musculus GN=Myo1c PE=1 SV=2
7	1.541	0.2422	7	0.649	46	1	SwissProt	RL19_MOUSE	182	28321	11	7	5	4	0.81	60S ribosomal protein L19 OS=Mus musculus GN=Rpl19 PE=1 SV=1
2	1.047	0.4661	2	0.955	47	1	SwissProt	ATRX_MOUSE	178	320665	8	2	8	2	0.03	Transcriptional regulator ATRX OS=Mus musculus GN=Atrx PE=1 SV=3
6	2.135	0.001259	6	0.468	48	1	SwissProt	EF2_MOUSE	175	105589	14	7	14	7	0.32	Elongation factor 2 OS=Mus musculus GN=Eef2 PE=1 SV=2
5	1.779	0.004723	5	0.562	49	1	SwissProt	RS26_MOUSE	175	15310	6	5	2	2	0.72	40S ribosomal protein S26 OS=Mus musculus GN=Rps26 PE=1 SV=3
6	1.928	0.005242	6	0.519	50	1	SwissProt	GBB1_MOUSE	175	39736	9	6	6	5	0.7	Guanine nucleotide-binding protein G(I)/G(S)/G(T) subunit beta-1 OS=Mus musculus GN=Gnb1 PE=1 SV=3
6	2.007	0.0004128	6	0.498	50	2	SwissProt	GBB2_MOUSE	174	39345	10	6	8	5	0.71	Guanine nucleotide-binding protein G(I)/G(S)/G(T) subunit beta-2 OS=Mus musculus GN=Gnb2 PE=1 SV=3
5	1.273	0.1069	5	0.785	51	1	SwissProt	SPB1_MOUSE	174	109130	13	5	10	5	0.21	pre-rRNA processing protein FTSJ3 OS=Mus musculus GN=Ftsj3 PE=1 SV=1
6	1.974	0.0006324	6	0.507	52	1	SwissProt	CLH1_MOUSE	169	207324	12	6	10	5	0.11	Clathrin heavy chain 1 OS=Mus musculus GN=Cltc PE=1 SV=3
5	1.886	0.002846	5	0.53	53	1	SwissProt	MOES_MOUSE	161	77206	16	5	12	4	0.24	Moesin OS=Mus musculus GN=Msn PE=1 SV=3
9	1.899	0.0001756	9	0.527	54	1	SwissProt	FLNA_MOUSE	159	307097	17	9	15	7	0.1	Filamin-A OS=Mus musculus GN=Flna PE=1 SV=5
9	1.801	0.00334	9	0.555	55	1	SwissProt	RL3_MOUSE	159	54580	20	9	13	7	0.85	60S ribosomal protein L3 OS=Mus musculus GN=Rpl3 PE=1 SV=3
5	1.813	0.007111	5	0.552	56	1	SwissProt	HS90B_MOUSE	156	94523	12	5	8	4	0.2	Heat shock protein HSP 90-beta OS=Mus musculus GN=Hsp90ab1 PE=1 SV=3
5	2.17	0.0005062	5	0.461	56	2	SwissProt	HS90A_MOUSE	132	96806	11	5	7	4	0.19	Heat shock protein HSP 90-alpha OS=Mus musculus GN=Hsp90aa1 PE=1 SV=4
3	1.427	0.13	3	0.701	57	1	SwissProt	RL32_MOUSE	155	18702	4	3	3	2	0.56	60S ribosomal protein L32 OS=Mus musculus GN=Rpl32 PE=1 SV=2
5	1.852	0.02014	5	0.54	58	1	SwissProt	RL28_MOUSE	154	17942	6	5	5	4	1.52	60S ribosomal protein L28 OS=Mus musculus GN=Rpl28 PE=1 SV=2
9	2.112	0.04551	9	0.473	59	1	SwissProt	RL6_MOUSE	152	40895	18	9	11	7	1.06	60S ribosomal protein L6 OS=Mus musculus GN=Rpl6 PE=1 SV=3
9	1.992	0.001665	9	0.502	60	1	SwissProt	PLEC_MOUSE	150	573987	48	9	39	9	0.07	Plectin OS=Mus musculus GN=Plec PE=1 SV=3
5	1.854	0.01863	5	0.539	61	1	SwissProt	RL18_MOUSE	147	24714	7	5	4	4	0.96	60S ribosomal protein L18 OS=Mus musculus GN=Rpl18 PE=1 SV=3
4	1.58	0.2207	4	0.633	62	1	SwissProt	RL29_MOUSE	147	22388	9	6	6	3	0.75	60S ribosomal protein L29 OS=Mus musculus GN=Rpl29 PE=1 SV=2
4	1.467	0.02695	4	0.682	63	1	SwissProt	RS27A_MOUSE	146	22028	8	4	4	2	0.46	Ubiquitin-40S ribosomal protein S27a OS=Mus musculus GN=Rps27a PE=1 SV=2
9	1.683	0.001749	9	0.594	64	1	SwissProt	TAOK1_MOUSE	146	126809	16	9	12	7	0.26	Serine/threonine-protein kinase TAO1 OS=Mus musculus GN=Taok1 PE=1 SV=1
4	1.516	0.3354	4	0.66	65	1	SwissProt	PTBP1_MOUSE	142	61138	7	4	3	3	0.23	Polypyrimidine tract-binding protein 1 OS=Mus musculus GN=Ptbp1 PE=1 SV=2
6	1.883	0.009185	6	0.531	66	1	SwissProt	DDX5_MOUSE	141	74804	9	7	5	4	0.25	Probable ATP-dependent RNA helicase DDX5 OS=Mus musculus GN=Ddx5 PE=1 SV=2
5	1.861	0.003369	5	0.537	67	1	SwissProt	RL17_MOUSE	136	25528	8	6	4	3	0.63	60S ribosomal protein L17 OS=Mus musculus GN=Rpl17 PE=1 SV=3
1	2.803	0	1	0.357	68	1	SwissProt	ROA1_MOUSE	130	37027	3	1	3	1	0.12	Heterogeneous nuclear ribonucleoprotein A1 OS=Mus musculus GN=Hnrnpa1 PE=1 SV=2
1	1.559	0	1	0.641	69	1	SwissProt	P5CR2_MOUSE	130	36574	2	1	2	1	0.12	Pyrroline-5-carboxylate reductase 2 OS=Mus musculus GN=Pycr2 PE=1 SV=1
6	1.774	0.0008905	6	0.564	70	1	SwissProt	LYRIC_MOUSE	130	74297	12	6	9	4	0.26	Protein LYRIC OS=Mus musculus GN=Mtdh PE=1 SV=1
6	1.723	0.0154	6	0.58	71	1	SwissProt	EF1A1_MOUSE	128	57341	9	7	8	7	0.67	Elongation factor 1-alpha 1 OS=Mus musculus GN=Eef1a1 PE=1 SV=3
1	3.584	0	1	0.279	72	1	SwissProt	ROA3_MOUSE	128	43026	4	2	2	1	0.22	Heterogeneous nuclear ribonucleoprotein A3 OS=Mus musculus GN=Hnrnpa3 PE=1 SV=1
8	2.176	1.24E-05	8	0.459	73	1	SwissProt	RAB1A_MOUSE	126	25485	15	8	9	6	1.67	Ras-related protein Rab-1A OS=Mus musculus GN=Rab1A PE=1 SV=3
3	2.014	0.1299	3	0.496	73	2	SwissProt	RAB1B_MOUSE	65	24794	7	3	6	3	0.66	Ras-related protein Rab-1B OS=Mus musculus GN=Rab1b PE=1 SV=1
5	2.08	0.02514	5	0.481	74	1	SwissProt	RL7A_MOUSE	124	35893	12	5	10	5	0.8	60S ribosomal protein L7a OS=Mus musculus GN=Rpl7a PE=1 SV=2
3	2.248	0.1176	3	0.445	75	1	SwissProt	SYVC_MOUSE	124	150805	8	3	7	2	0.06	Valine--tRNA ligase OS=Mus musculus GN=Vars PE=1 SV=1
5	2.126	---	5	0.47	76	1	SwissProt	VDAC2_MOUSE	123	35798	8	5	5	3	0.42	Voltage-dependent anion-selective channel protein 2 OS=Mus musculus GN=Vdac2 PE=1 SV=2
4	1.711	0.05598	4	0.584	77	1	SwissProt	DHE3_MOUSE	123	66684	7	4	5	3	0.21	Glutamate dehydrogenase 1, mitochondrial OS=Mus musculus GN=Glud1 PE=1 SV=1
7	1.623	0.0008754	7	0.616	78	1	SwissProt	NOG1_MOUSE	120	84840	16	8	11	7	0.42	Nucleolar GTP-binding protein 1 OS=Mus musculus GN=Gtpbp4 PE=1 SV=3
7	1.686	0.000177	7	0.593	79	1	SwissProt	PA2G4_MOUSE	120	50210	11	7	5	4	0.4	Proliferation-associated protein 2G4 OS=Mus musculus GN=Pa2g4 PE=1 SV=3
7	1.693	0.004728	7	0.591	80	1	SwissProt	IF2P_MOUSE	119	163206	17	7	14	6	0.17	Eukaryotic translation initiation factor 5B OS=Mus musculus GN=Eif5b PE=1 SV=2
5	2.091	0.01582	5	0.478	81	1	SwissProt	TOP1_MOUSE	116	110585	23	5	18	5	0.21	DNA topoisomerase 1 OS=Mus musculus GN=Top1 PE=1 SV=2
6	2.338	6.46E-05	6	0.428	82	1	SwissProt	ANXA2_MOUSE	115	43836	15	6	10	5	0.62	Annexin A2 OS=Mus musculus GN=Anxa2 PE=1 SV=2
5	1.627	0.009393	5	0.615	83	1	SwissProt	AEBP1_MOUSE	112	139545	10	5	8	5	0.16	Adipocyte enhancer-binding protein 1 OS=Mus musculus GN=Aebp1 PE=1 SV=1
2	2.931	0.0722	2	0.341	84	1	SwissProt	TPIS_MOUSE	112	35999	3	2	3	2	0.26	Triosephosphate isomerase OS=Mus musculus GN=Tpi1 PE=1 SV=4
2	1.607	0.5081	2	0.622	85	1	SwissProt	SCOT1_MOUSE	111	62260	5	2	4	1	0.07	Succinyl-CoA:3-ketoacid coenzyme A transferase 1, mitochondrial OS=Mus musculus GN=Oxct1 PE=1 SV=1
3	1.807	0.3741	3	0.553	86	1	SwissProt	MK67I_MOUSE	110	43042	4	3	4	3	0.34	MKI67 FHA domain-interacting nucleolar phosphoprotein OS=Mus musculus GN=Nifk PE=1 SV=1
2	2.051	0.03409	2	0.488	87	1	SwissProt	ARF1_MOUSE	108	22470	3	2	2	1	0.2	ADP-ribosylation factor 1 OS=Mus musculus GN=Arf1 PE=1 SV=2
7	1.528	0.009526	7	0.655	88	1	SwissProt	NOP56_MOUSE	106	74247	17	7	10	5	0.33	Nucleolar protein 56 OS=Mus musculus GN=Nop56 PE=1 SV=2
1	1.739	0	1	0.575	89	1	SwissProt	H2B1M_MOUSE	103	16954	3	2	2	1	0.28	Histone H2B type 1-M OS=Mus musculus GN=Hist1h2bm PE=1 SV=2
5	2.147	0.0004828	5	0.466	90	1	SwissProt	LMNA_MOUSE	103	80242	9	5	7	4	0.23	Prelamin-A/C OS=Mus musculus GN=Lmna PE=1 SV=2
5	2.388	5.23E-05	5	0.419	91	1	SwissProt	AP2M1_MOUSE	101	55585	10	5	8	4	0.35	AP-2 complex subunit mu OS=Mus musculus GN=Ap2m1 PE=1 SV=1
4	1.95	0.02485	4	0.513	92	1	SwissProt	RL30_MOUSE	100	15108	4	4	2	2	0.73	60S ribosomal protein L30 OS=Mus musculus GN=Rpl30 PE=1 SV=2
2	2.11	0.1358	2	0.474	93	1	SwissProt	RL23_MOUSE	98	17276	5	2	4	2	0.61	60S ribosomal protein L23 OS=Mus musculus GN=Rpl23 PE=1 SV=1
2	2.084	0.145	2	0.48	94	1	SwissProt	TLN1_MOUSE	98	295453	12	3	10	2	0.03	Talin-1 OS=Mus musculus GN=Tln1 PE=1 SV=2
4	1.516	0.1774	4	0.66	95	1	SwissProt	LYAR_MOUSE	95	53820	9	4	8	4	0.37	Cell growth-regulating nucleolar protein OS=Mus musculus GN=Lyar PE=1 SV=2
4	1.828	0.01174	4	0.547	96	1	SwissProt	RL10_MOUSE	95	28502	9	4	4	3	0.55	60S ribosomal protein L10 OS=Mus musculus GN=Rpl10 PE=1 SV=3
5	1.871	0.003555	5	0.534	97	1	SwissProt	FSCN1_MOUSE	94	59250	8	5	6	4	0.33	Fascin OS=Mus musculus GN=Fscn1 PE=1 SV=4
2	2.12	0.4816	2	0.472	98	1	SwissProt	PPIA_MOUSE	91	20148	7	2	5	1	0.51	Peptidyl-prolyl cis-trans isomerase A OS=Mus musculus GN=Ppia PE=1 SV=2
1	1.811	0	1	0.552	99	1	SwissProt	MOT1_MOUSE	91	57894	1	1	1	1	0.08	Monocarboxylate transporter 1 OS=Mus musculus GN=Slc16a1 PE=1 SV=1
2	2.099	0.02305	2	0.476	100	1	SwissProt	DDX21_MOUSE	89	108819	2	2	2	2	0.08	Nucleolar RNA helicase 2 OS=Mus musculus GN=Ddx21 PE=1 SV=3
6	1.545	0.01311	6	0.647	101	1	SwissProt	ACACA_MOUSE	89	282824	20	6	17	6	0.09	Acetyl-CoA carboxylase 1 OS=Mus musculus GN=Acaca PE=1 SV=1
3	1.803	0.01474	3	0.555	102	1	SwissProt	RS14_MOUSE	89	18307	6	3	5	3	0.97	40S ribosomal protein S14 OS=Mus musculus GN=Rps14 PE=1 SV=3
5	2.186	0.008731	5	0.458	103	1	SwissProt	RL26_MOUSE	89	20850	8	5	6	4	1.22	60S ribosomal protein L26 OS=Mus musculus GN=Rpl26 PE=1 SV=1
2	1.68	0.2153	2	0.595	104	1	SwissProt	ATPG_MOUSE	89	37014	2	2	2	2	0.26	ATP synthase subunit gamma, mitochondrial OS=Mus musculus GN=Atp5c1 PE=1 SV=1
2	1.527	0.2641	2	0.655	105	1	SwissProt	NOP58_MOUSE	88	71337	6	3	5	2	0.13	Nucleolar protein 58 OS=Mus musculus GN=Nop58 PE=1 SV=1
3	1.456	0.1189	3	0.687	106	1	SwissProt	ATPA_MOUSE	88	64441	13	3	9	3	0.22	ATP synthase subunit alpha, mitochondrial OS=Mus musculus GN=Atp5a1 PE=1 SV=1
4	1.425	0.00804	4	0.702	107	1	SwissProt	EFTU_MOUSE	87	54487	7	4	3	2	0.17	Elongation factor Tu, mitochondrial OS=Mus musculus GN=Tufm PE=1 SV=1
3	2.135	0.06589	3	0.468	108	1	SwissProt	SEPT9_MOUSE	87	72072	8	3	8	3	0.19	Septin-9 OS=Mus musculus GN=Sept9 PE=1 SV=1
4	2.14	0.02761	4	0.467	109	1	SwissProt	COF1_MOUSE	86	22522	6	4	6	4	1.1	Cofilin-1 OS=Mus musculus GN=Cfl1 PE=1 SV=3
2	2.244	0.04579	2	0.446	110	1	SwissProt	RAB5C_MOUSE	86	25643	4	2	4	2	0.39	Ras-related protein Rab-5C OS=Mus musculus GN=Rab5c PE=1 SV=2
3	2.39	0.0004678	3	0.418	111	1	SwissProt	RS2_MOUSE	86	35099	5	3	4	3	0.43	40S ribosomal protein S2 OS=Mus musculus GN=Rps2 PE=1 SV=3
2	1.413	0.3949	2	0.708	112	1	SwissProt	BBX_MOUSE	84	117741	7	2	6	2	0.07	HMG box transcription factor BBX OS=Mus musculus GN=Bbx PE=1 SV=2
2	1.772	0.03365	2	0.564	113	1	SwissProt	DDX3X_MOUSE	84	78211	2	2	2	2	0.11	ATP-dependent RNA helicase DDX3X OS=Mus musculus GN=Ddx3x PE=1 SV=3
5	2.242	0.001106	5	0.446	114	1	SwissProt	NEST_MOUSE	80	218435	9	5	7	3	0.06	Nestin OS=Mus musculus GN=Nes PE=1 SV=1
1	1.528	0	1	0.655	115	1	SwissProt	MMTA2_MOUSE	79	34697	3	1	3	1	0.13	Multiple myeloma tumor-associated protein 2 homolog OS=Mus musculus GN=Mmtag2 PE=2 SV=1
3	1.479	0.004702	3	0.676	116	1	SwissProt	COPB_MOUSE	78	118225	7	3	6	2	0.07	Coatomer subunit beta OS=Mus musculus GN=Copb1 PE=1 SV=1
2	1.613	0.1353	2	0.62	117	1	SwissProt	BRD7_MOUSE	78	82738	5	2	4	2	0.11	Bromodomain-containing protein 7 OS=Mus musculus GN=Brd7 PE=1 SV=1
3	2.04	0.02296	3	0.49	118	1	SwissProt	RL35_MOUSE	78	18578	7	4	3	3	0.96	60S ribosomal protein L35 OS=Mus musculus GN=Rpl35 PE=1 SV=1
1	1.593	0	1	0.628	119	1	SwissProt	SYQ_MOUSE	77	95738	8	1	5	1	0.05	Glutamine--tRNA ligase OS=Mus musculus GN=Qars PE=1 SV=1
3	1.836	0.0275	3	0.545	120	1	SwissProt	ENPL_MOUSE	77	103799	6	3	6	3	0.13	Endoplasmin OS=Mus musculus GN=Hsp90b1 PE=1 SV=2
1	1.828	0	1	0.547	121	1	SwissProt	TERA_MOUSE	76	96867	5	1	5	1	0.04	Transitional endoplasmic reticulum ATPase OS=Mus musculus GN=Vcp PE=1 SV=4
4	2.403	0.004297	4	0.416	122	1	SwissProt	ENOA_MOUSE	75	52497	7	4	6	3	0.27	Alpha-enolase OS=Mus musculus GN=Eno1 PE=1 SV=3
5	2.063	0.001244	5	0.485	123	1	SwissProt	RS4X_MOUSE	75	33842	10	5	7	4	0.64	40S ribosomal protein S4, X isoform OS=Mus musculus GN=Rps4x PE=1 SV=2
4	2.217	0.003224	4	0.451	124	1	SwissProt	GELS_MOUSE	75	92340	13	4	10	4	0.2	Gelsolin OS=Mus musculus GN=Gsn PE=1 SV=3
1	2.285	0	1	0.438	125	1	SwissProt	SERPH_MOUSE	74	51806	3	1	3	1	0.08	Serpin H1 OS=Mus musculus GN=Serpinh1 PE=1 SV=3
2	1.947	0.0831	2	0.514	126	1	SwissProt	H31_MOUSE	74	17526	9	3	5	3	1.03	Histone H3.1 OS=Mus musculus GN=Hist1h3a PE=1 SV=2
2	2.824	0.2007	2	0.354	127	1	SwissProt	PRP8_MOUSE	74	296802	9	2	7	2	0.03	Pre-mRNA-processing-splicing factor 8 OS=Mus musculus GN=Prpf8 PE=1 SV=2
2	1.162	0.581	2	0.861	128	1	SwissProt	SMN_MOUSE	73	35293	2	2	1	1	0.13	Survival motor neuron protein OS=Mus musculus GN=Smn1 PE=1 SV=1
2	1.439	0.01814	2	0.695	129	1	SwissProt	HCD2_MOUSE	72	29533	2	2	2	2	0.33	3-hydroxyacyl-CoA dehydrogenase type-2 OS=Mus musculus GN=Hsd17b10 PE=1 SV=4
1	2.028	0	1	0.493	130	1	SwissProt	RAB7A_MOUSE	72	26354	3	1	3	1	0.17	Ras-related protein Rab-7a OS=Mus musculus GN=Rab7a PE=1 SV=2
1	1.944	0	1	0.514	131	1	SwissProt	PCKGM_MOUSE	71	74940	2	1	2	1	0.06	Phosphoenolpyruvate carboxykinase [GTP], mitochondrial OS=Mus musculus GN=Pck2 PE=1 SV=1
1	2.3	0	1	0.435	132	1	SwissProt	1433T_MOUSE	71	30928	1	1	1	1	0.14	14-3-3 protein theta OS=Mus musculus GN=Ywhaq PE=1 SV=1
2	2.165	0.1355	2	0.462	133	1	SwissProt	RS9_MOUSE	71	25517	5	3	3	2	0.39	40S ribosomal protein S9 OS=Mus musculus GN=Rps9 PE=1 SV=3
3	2.166	0.06472	3	0.462	134	1	SwissProt	RL34_MOUSE	71	15818	3	3	3	3	1.19	60S ribosomal protein L34 OS=Mus musculus GN=Rpl34 PE=1 SV=2
3	1.878	0.06138	3	0.532	135	1	SwissProt	AT2A2_MOUSE	71	125228	7	3	7	3	0.11	Sarcoplasmic/endoplasmic reticulum calcium ATPase 2 OS=Mus musculus GN=Atp2a2 PE=1 SV=2
3	1.949	0.05973	3	0.513	136	1	SwissProt	S61A1_MOUSE	71	55569	7	3	5	3	0.26	Protein transport protein Sec61 subunit alpha isoform 1 OS=Mus musculus GN=Sec61a1 PE=1 SV=2
2	1.468	0.02849	2	0.681	137	1	SwissProt	ODPA_MOUSE	70	47346	3	2	1	1	0.09	Pyruvate dehydrogenase E1 component subunit alpha, somatic form, mitochondrial OS=Mus musculus GN=Pdha1 PE=1 SV=1
2	1.805	0.106	2	0.554	138	1	SwissProt	ROA2_MOUSE	69	40319	4	2	2	1	0.11	Heterogeneous nuclear ribonucleoproteins A2/B1 OS=Mus musculus GN=Hnrnpa2b1 PE=1 SV=2
3	3.83	0.2562	3	0.261	139	1	SwissProt	RL7_MOUSE	68	37653	9	4	9	4	0.56	60S ribosomal protein L7 OS=Mus musculus GN=Rpl7 PE=1 SV=2
1	1.356	0	1	0.738	140	1	SwissProt	AT1A1_MOUSE	68	122435	6	1	5	1	0.04	Sodium/potassium-transporting ATPase subunit alpha-1 OS=Mus musculus GN=Atp1a1 PE=1 SV=1
1	2.033	0	1	0.492	141	1	SwissProt	ILVBL_MOUSE	67	72199	1	1	1	1	0.06	Acetolactate synthase-like protein OS=Mus musculus GN=Ilvbl PE=1 SV=1
2	1.983	0.03748	2	0.504	142	1	SwissProt	DOCK7_MOUSE	67	260171	11	2	11	2	0.03	Dedicator of cytokinesis protein 7 OS=Mus musculus GN=Dock7 PE=1 SV=3
3	2.607	0.07847	3	0.384	143	1	SwissProt	RL13A_MOUSE	67	27742	5	3	3	2	0.35	60S ribosomal protein L13a OS=Mus musculus GN=Rpl13a PE=1 SV=4
1	2.219	0	1	0.451	144	1	SwissProt	SOAT1_MOUSE	67	68074	1	1	1	1	0.06	Sterol O-acyltransferase 1 OS=Mus musculus GN=Soat1 PE=1 SV=2
---	---	---	---	---	145	1	SwissProt	TADBP_MOUSE	66	48089	2	2	1	1	0.09	TAR DNA-binding protein 43 OS=Mus musculus GN=Tardbp PE=1 SV=1
---	---	---	---	---	146	1	SwissProt	PGK1_MOUSE	65	50973	4	1	4	1	0.09	Phosphoglycerate kinase 1 OS=Mus musculus GN=Pgk1 PE=1 SV=4
2	1.6	0.2616	2	0.625	147	1	SwissProt	LDHA_MOUSE	65	40852	2	2	2	2	0.23	L-lactate dehydrogenase A chain OS=Mus musculus GN=Ldha PE=1 SV=3
1	1.549	0	1	0.645	148	1	SwissProt	CAPZB_MOUSE	64	34637	4	1	3	1	0.13	F-actin-capping protein subunit beta OS=Mus musculus GN=Capzb PE=1 SV=3
2	2.548	0.08804	2	0.392	149	1	SwissProt	HNRPK_MOUSE	64	54544	5	2	4	1	0.08	Heterogeneous nuclear ribonucleoprotein K OS=Mus musculus GN=Hnrnpk PE=1 SV=1
3	1.75	0.002173	3	0.571	150	1	SwissProt	HNRH1_MOUSE	63	51903	7	4	6	3	0.28	Heterogeneous nuclear ribonucleoprotein H OS=Mus musculus GN=Hnrnph1 PE=1 SV=3
1	3.439	0	1	0.291	150	2	SwissProt	HNRPF_MOUSE	36	48493	3	2	3	2	0.19	Heterogeneous nuclear ribonucleoprotein F OS=Mus musculus GN=Hnrnpf PE=1 SV=3
2	1.476	0.4655	2	0.677	151	1	SwissProt	ACADV_MOUSE	63	77138	5	2	4	2	0.12	Very long-chain specific acyl-CoA dehydrogenase, mitochondrial OS=Mus musculus GN=Acadvl PE=1 SV=3
1	2.302	0	1	0.434	152	1	SwissProt	RL15_MOUSE	62	26839	2	1	2	1	0.17	60S ribosomal protein L15 OS=Mus musculus GN=Rpl15 PE=2 SV=4
1	1.669	0	1	0.599	153	1	SwissProt	ACOT9_MOUSE	62	55713	5	1	4	1	0.08	Acyl-coenzyme A thioesterase 9, mitochondrial OS=Mus musculus GN=Acot9 PE=1 SV=1
4	1.906	0.003929	4	0.525	154	1	SwissProt	RBBP6_MOUSE	62	233059	12	4	11	4	0.08	E3 ubiquitin-protein ligase RBBP6 OS=Mus musculus GN=Rbbp6 PE=1 SV=5
5	1.931	0.03476	5	0.518	155	1	SwissProt	COPA_MOUSE	61	152102	16	5	14	5	0.15	Coatomer subunit alpha OS=Mus musculus GN=Copa PE=1 SV=2
1	2.143	0	1	0.467	156	1	SwissProt	XRN2_MOUSE	61	117513	1	1	1	1	0.04	5'-3' exoribonuclease 2 OS=Mus musculus GN=Xrn2 PE=1 SV=1
2	2.106	0.08354	2	0.475	157	1	SwissProt	RS30_MOUSE	61	8661	3	2	2	1	0.6	40S ribosomal protein S30 OS=Mus musculus GN=Fau PE=1 SV=1
3	1.677	0.02189	3	0.596	158	1	SwissProt	DKC1_MOUSE	61	66035	6	3	4	2	0.14	H/ACA ribonucleoprotein complex subunit 4 OS=Mus musculus GN=Dkc1 PE=1 SV=4
2	3.058	0.04167	2	0.327	159	1	SwissProt	LOX5_MOUSE	61	84798	5	2	4	2	0.1	Arachidonate 5-lipoxygenase OS=Mus musculus GN=Alox5 PE=1 SV=3
2	2.369	0.01422	2	0.422	160	1	SwissProt	MPCP_MOUSE	60	43521	4	2	4	2	0.21	Phosphate carrier protein, mitochondrial OS=Mus musculus GN=Slc25a3 PE=1 SV=1
3	2.109	0.02903	3	0.474	161	1	SwissProt	RL36A_MOUSE	60	16032	8	3	5	2	0.68	60S ribosomal protein L36a OS=Mus musculus GN=Rpl36a PE=1 SV=2
2	2.743	0.1029	2	0.365	162	1	SwissProt	HNRPU_MOUSE	60	98460	12	3	11	3	0.14	Heterogeneous nuclear ribonucleoprotein U OS=Mus musculus GN=Hnrnpu PE=1 SV=1
4	1.44	---	4	0.695	163	1	SwissProt	TNS2_MOUSE	60	162502	10	4	8	4	0.11	Tensin-2 OS=Mus musculus GN=Tns2 PE=1 SV=1
1	1.958	0	1	0.511	164	1	SwissProt	PRS7_MOUSE	59	53772	4	1	3	1	0.08	26S proteasome regulatory subunit 7 OS=Mus musculus GN=Psmc2 PE=1 SV=5
1	1.812	0	1	0.552	165	1	SwissProt	PRDX4_MOUSE	58	33711	4	1	4	1	0.13	Peroxiredoxin-4 OS=Mus musculus GN=Prdx4 PE=1 SV=1
2	2.252	0.02475	2	0.444	166	1	SwissProt	RS3A_MOUSE	58	35714	6	2	5	2	0.26	40S ribosomal protein S3a OS=Mus musculus GN=Rps3a PE=1 SV=3
1	2.459	0	1	0.407	167	1	SwissProt	AT2B1_MOUSE	58	148600	5	1	4	1	0.03	Plasma membrane calcium-transporting ATPase 1 OS=Mus musculus GN=Atp2b1 PE=1 SV=1
1	1.189	0	1	0.841	168	1	SwissProt	CTCF_MOUSE	57	94742	2	1	2	1	0.05	Transcriptional repressor CTCF OS=Mus musculus GN=Ctcf PE=1 SV=2
1	1.991	0	1	0.502	169	1	SwissProt	VDAC1_MOUSE	57	36249	2	1	2	1	0.12	Voltage-dependent anion-selective channel protein 1 OS=Mus musculus GN=Vdac1 PE=1 SV=3
2	1.732	0.06517	2	0.578	170	1	SwissProt	RL11_MOUSE	57	22917	8	2	5	1	0.44	60S ribosomal protein L11 OS=Mus musculus GN=Rpl11 PE=1 SV=4
1	1.894	0	1	0.528	171	1	SwissProt	VATB2_MOUSE	57	60171	4	1	4	1	0.07	V-type proton ATPase subunit B, brain isoform OS=Mus musculus GN=Atp6v1b2 PE=1 SV=1
3	1.633	0.139	3	0.612	172	1	SwissProt	ESYT2_MOUSE	57	102030	8	3	6	3	0.13	Extended synaptotagmin-2 OS=Mus musculus GN=Esyt2 PE=1 SV=1
2	1.666	0.2759	2	0.6	173	1	SwissProt	TCPA_MOUSE	56	66775	4	2	4	2	0.13	T-complex protein 1 subunit alpha OS=Mus musculus GN=Tcp1 PE=1 SV=3
2	1.748	0.3782	2	0.572	174	1	SwissProt	ACON_MOUSE	55	94077	6	2	6	2	0.09	Aconitate hydratase, mitochondrial OS=Mus musculus GN=Aco2 PE=1 SV=1
1	1.723	0	1	0.58	175	1	SwissProt	ITPR3_MOUSE	55	330420	3	1	3	1	0.01	Inositol 1,4,5-trisphosphate receptor type 3 OS=Mus musculus GN=Itpr3 PE=1 SV=3
1	1.712	0	1	0.584	176	1	SwissProt	RABL6_MOUSE	55	89145	7	1	5	1	0.05	Rab-like protein 6 OS=Mus musculus GN=Rabl6 PE=1 SV=2
1	1.944	0	1	0.514	177	1	SwissProt	USP9X_MOUSE	55	313371	1	1	1	1	0.01	Probable ubiquitin carboxyl-terminal hydrolase FAF-X OS=Mus musculus GN=Usp9x PE=1 SV=2
1	2.168	0	1	0.461	178	1	SwissProt	RCC2_MOUSE	55	61157	2	1	2	1	0.07	Protein RCC2 OS=Mus musculus GN=Rcc2 PE=1 SV=1
3	1.679	0.07607	3	0.596	179	1	SwissProt	IF4A1_MOUSE	54	49379	5	4	4	3	0.29	Eukaryotic initiation factor 4A-I OS=Mus musculus GN=Eif4a1 PE=1 SV=1
1	1.955	0	1	0.512	180	1	SwissProt	U2AF1_MOUSE	54	29896	1	1	1	1	0.15	Splicing factor U2AF 35 kDa subunit OS=Mus musculus GN=U2af1 PE=1 SV=4
1	2.067	0	1	0.484	181	1	SwissProt	PYR1_MOUSE	54	258475	3	1	3	1	0.02	CAD protein OS=Mus musculus GN=Cad PE=1 SV=1
1	2.206	0	1	0.453	182	1	SwissProt	SYEP_MOUSE	53	192490	3	1	3	1	0.02	Bifunctional glutamate/proline--tRNA ligase OS=Mus musculus GN=Eprs PE=1 SV=4
1	1.693	0	1	0.591	183	1	SwissProt	CDC42_MOUSE	53	24181	1	1	1	1	0.19	Cell division control protein 42 homolog OS=Mus musculus GN=Cdc42 PE=1 SV=2
1	1.9	0	1	0.526	184	1	SwissProt	MYL6B_MOUSE	53	25875	1	1	1	1	0.18	Myosin light chain 6B OS=Mus musculus GN=Myl6b PE=1 SV=1
3	2.508	0.05863	3	0.399	185	1	SwissProt	RS16_MOUSE	52	18999	5	3	3	3	0.93	40S ribosomal protein S16 OS=Mus musculus GN=Rps16 PE=1 SV=4
1	1.371	0	1	0.729	186	1	SwissProt	ABCB6_MOUSE	52	97106	1	1	1	1	0.04	ATP-binding cassette sub-family B member 6, mitochondrial OS=Mus musculus GN=Abcb6 PE=1 SV=1
1	2.106	0	1	0.475	187	1	SwissProt	RAB5B_MOUSE	51	26082	2	1	2	1	0.17	Ras-related protein Rab-5B OS=Mus musculus GN=Rab5b PE=1 SV=1
2	1.697	0.1699	2	0.589	188	1	SwissProt	DPYL3_MOUSE	51	67340	4	2	4	2	0.13	Dihydropyrimidinase-related protein 3 OS=Mus musculus GN=Dpysl3 PE=1 SV=1
1	2.948	0	1	0.339	189	1	SwissProt	S10A4_MOUSE	50	13671	2	1	2	1	0.35	Protein S100-A4 OS=Mus musculus GN=S100a4 PE=1 SV=1
1	1.869	0	1	0.535	190	1	SwissProt	RBM39_MOUSE	50	64987	1	1	1	1	0.07	RNA-binding protein 39 OS=Mus musculus GN=Rbm39 PE=1 SV=2
2	1.303	0.322	2	0.767	191	1	SwissProt	CISY_MOUSE	50	56023	6	2	4	2	0.16	Citrate synthase, mitochondrial OS=Mus musculus GN=Cs PE=1 SV=1
1	2.447	0	1	0.409	192	1	SwissProt	NUP85_MOUSE	50	80191	1	1	1	1	0.05	Nuclear pore complex protein Nup85 OS=Mus musculus GN=Nup85 PE=1 SV=1
1	1.98	0	1	0.505	193	1	SwissProt	TCPB_MOUSE	49	63259	4	1	3	1	0.07	T-complex protein 1 subunit beta OS=Mus musculus GN=Cct2 PE=1 SV=4
4	2.035	0.02092	4	0.491	194	1	SwissProt	RACK1_MOUSE	49	38105	6	4	5	4	0.55	Receptor of activated protein C kinase 1 OS=Mus musculus GN=Rack1 PE=1 SV=3
1	2.132	0	1	0.469	195	1	SwissProt	ARGL1_MOUSE	49	37767	9	1	8	1	0.12	Arginine and glutamate-rich protein 1 OS=Mus musculus GN=Arglu1 PE=1 SV=2
1	2.447	0	1	0.409	196	1	SwissProt	RL9_MOUSE	48	24576	1	1	1	1	0.19	60S ribosomal protein L9 OS=Mus musculus GN=Rpl9 PE=2 SV=2
2	1.231	0.5939	2	0.812	197	1	SwissProt	P5CS_MOUSE	48	93258	4	2	3	1	0.05	Delta-1-pyrroline-5-carboxylate synthase OS=Mus musculus GN=Aldh18a1 PE=1 SV=2
1	2.504	0	1	0.399	198	1	SwissProt	KCC2D_MOUSE	47	62293	3	1	3	1	0.07	Calcium/calmodulin-dependent protein kinase type II subunit delta OS=Mus musculus GN=Camk2d PE=1 SV=1
1	2.079	0	1	0.481	199	1	SwissProt	ZYX_MOUSE	47	66141	3	1	3	1	0.07	Zyxin OS=Mus musculus GN=Zyx PE=1 SV=2
1	1.663	0	1	0.601	200	1	SwissProt	STAT3_MOUSE	47	95713	1	1	1	1	0.05	Signal transducer and activator of transcription 3 OS=Mus musculus GN=Stat3 PE=1 SV=2
1	2.42	0	1	0.413	201	1	SwissProt	MYADM_MOUSE	47	36579	2	1	2	1	0.12	Myeloid-associated differentiation marker OS=Mus musculus GN=Myadm PE=1 SV=2
1	1.656	0	1	0.604	202	1	SwissProt	IF2A_MOUSE	46	39541	3	1	3	1	0.11	Eukaryotic translation initiation factor 2 subunit 1 OS=Mus musculus GN=Eif2s1 PE=1 SV=3
1	1.476	0	1	0.678	203	1	SwissProt	NSMA3_MOUSE	46	98626	4	1	3	1	0.04	Sphingomyelin phosphodiesterase 4 OS=Mus musculus GN=Smpd4 PE=1 SV=2
1	1.455	0	1	0.687	204	1	SwissProt	AKIP_MOUSE	46	26483	1	1	1	1	0.17	Aurora kinase A-interacting protein OS=Mus musculus GN=Aurkaip1 PE=2 SV=2
2	3.066	0.4074	2	0.326	205	1	SwissProt	NU188_MOUSE	45	209628	3	2	3	2	0.04	Nucleoporin NUP188 homolog OS=Mus musculus GN=Nup188 PE=1 SV=2
1	1.219	0	1	0.821	206	1	SwissProt	CHD4_MOUSE	45	244602	5	1	3	1	0.02	Chromodomain-helicase-DNA-binding protein 4 OS=Mus musculus GN=Chd4 PE=1 SV=1
1	2.241	0	1	0.446	207	1	SwissProt	H4_MOUSE	45	13090	5	1	5	1	0.37	Histone H4 OS=Mus musculus GN=Hist1h4a PE=1 SV=2
2	1.223	0.5965	2	0.817	208	1	SwissProt	CLIC4_MOUSE	45	32541	2	2	2	2	0.29	Chloride intracellular channel protein 4 OS=Mus musculus GN=Clic4 PE=1 SV=3
4	1.518	0.01427	4	0.659	209	1	SwissProt	RL27A_MOUSE	44	19447	8	4	5	3	0.9	60S ribosomal protein L27a OS=Mus musculus GN=Rpl27a PE=1 SV=5
1	1.836	0	1	0.545	210	1	SwissProt	RRBP1_MOUSE	44	207240	4	1	4	1	0.02	Ribosome-binding protein 1 OS=Mus musculus GN=Rrbp1 PE=1 SV=2
2	1.173	0.702	2	0.853	211	1	SwissProt	ARL8B_MOUSE	44	23771	3	2	2	2	0.42	ADP-ribosylation factor-like protein 8B OS=Mus musculus GN=Arl8b PE=1 SV=1
1	2.688	0	1	0.372	212	1	SwissProt	HNRPQ_MOUSE	44	76590	2	1	2	1	0.06	Heterogeneous nuclear ribonucleoprotein Q OS=Mus musculus GN=Syncrip PE=1 SV=2
5	2.467	0.0006193	5	0.405	213	1	SwissProt	RL5_MOUSE	43	39506	12	5	10	5	0.7	60S ribosomal protein L5 OS=Mus musculus GN=Rpl5 PE=1 SV=3
1	2.369	0	1	0.422	214	1	SwissProt	DHX9_MOUSE	43	160203	8	1	7	1	0.03	ATP-dependent RNA helicase A OS=Mus musculus GN=Dhx9 PE=1 SV=2
3	2.156	0.01375	3	0.464	215	1	SwissProt	IF2G_MOUSE	43	56935	4	3	4	3	0.25	Eukaryotic translation initiation factor 2 subunit 3, X-linked OS=Mus musculus GN=Eif2s3x PE=1 SV=2
3	1.67	0.01128	3	0.599	216	1	SwissProt	FLNC_MOUSE	42	316329	7	3	5	2	0.03	Filamin-C OS=Mus musculus GN=Flnc PE=1 SV=3
1	2.636	0	1	0.379	217	1	SwissProt	ACADL_MOUSE	42	52456	3	1	3	1	0.08	Long-chain specific acyl-CoA dehydrogenase, mitochondrial OS=Mus musculus GN=Acadl PE=1 SV=2
3	1.939	---	3	0.516	218	1	SwissProt	HNRPL_MOUSE	42	68874	5	3	4	2	0.13	Heterogeneous nuclear ribonucleoprotein L OS=Mus musculus GN=Hnrnpl PE=1 SV=2
1	1.768	0	1	0.566	219	1	SwissProt	VMA5A_MOUSE	42	96043	6	1	3	1	0.05	von Willebrand factor A domain-containing protein 5A OS=Mus musculus GN=Vwa5a PE=1 SV=2
1	18.927	0	1	0.053	220	1	SwissProt	TMOD2_MOUSE	42	44674	2	1	2	1		Tropomodulin-2 OS=Mus musculus GN=Tmod2 PE=1 SV=2
2	2.091	0.09568	2	0.478	221	1	SwissProt	DDX27_MOUSE	42	98677	6	2	6	2	0.09	Probable ATP-dependent RNA helicase DDX27 OS=Mus musculus GN=Ddx27 PE=1 SV=3
1	2.258	0	1	0.443	222	1	SwissProt	THIL_MOUSE	42	49741	2	1	2	1	0.09	Acetyl-CoA acetyltransferase, mitochondrial OS=Mus musculus GN=Acat1 PE=1 SV=1
1	3.907	0	1	0.256	223	1	SwissProt	ERD21_MOUSE	41	26501	3	1	3	1	0.17	ER lumen protein-retaining receptor 1 OS=Mus musculus GN=Kdelr1 PE=1 SV=1
2	1.613	0.03272	2	0.62	224	1	SwissProt	RSBN1_MOUSE	41	97111	4	2	3	2	0.09	Round spermatid basic protein 1 OS=Mus musculus GN=Rsbn1 PE=1 SV=3
1	2.442	0	1	0.409	225	1	SwissProt	IDHC_MOUSE	41	52664	2	1	2	1	0.08	Isocitrate dehydrogenase [NADP] cytoplasmic OS=Mus musculus GN=Idh1 PE=1 SV=2
1	1.574	0	1	0.635	226	1	SwissProt	IF6_MOUSE	40	27872	1	1	1	1	0.16	Eukaryotic translation initiation factor 6 OS=Mus musculus GN=Eif6 PE=1 SV=2
1	1.299	0	1	0.77	227	1	SwissProt	RS12_MOUSE	40	17307	1	1	1	1	0.27	40S ribosomal protein S12 OS=Mus musculus GN=Rps12 PE=1 SV=2
1	2.457	0	1	0.407	228	1	SwissProt	COR1C_MOUSE	40	59103	3	1	3	1	0.07	Coronin-1C OS=Mus musculus GN=Coro1c PE=1 SV=2
1	2.198	0	1	0.455	229	1	SwissProt	COR1B_MOUSE	40	57820	3	1	3	1	0.08	Coronin-1B OS=Mus musculus GN=Coro1b PE=1 SV=1
1	1.83	0	1	0.546	230	1	SwissProt	HUWE1_MOUSE	40	514079	18	1	9	1	0.01	E3 ubiquitin-protein ligase HUWE1 OS=Mus musculus GN=Huwe1 PE=1 SV=5
1	1.167	0	1	0.857	231	1	SwissProt	CNN3_MOUSE	39	40179	3	1	3	1	0.11	Calponin-3 OS=Mus musculus GN=Cnn3 PE=1 SV=1
3	1.806	0.03761	3	0.554	232	1	SwissProt	ACLY_MOUSE	39	131371	6	3	4	3	0.1	ATP-citrate synthase OS=Mus musculus GN=Acly PE=1 SV=1
3	1.974	0.005321	3	0.507	233	1	SwissProt	RINI_MOUSE	38	54665	7	4	6	3	0.26	Ribonuclease inhibitor OS=Mus musculus GN=Rnh1 PE=1 SV=1
1	2.269	0	1	0.441	234	1	SwissProt	PRDX1_MOUSE	38	25272	4	1	4	1	0.18	Peroxiredoxin-1 OS=Mus musculus GN=Prdx1 PE=1 SV=1
3	1.164	0.832	3	0.859	235	1	SwissProt	FLII_MOUSE	38	157809	11	3	5	1	0.03	Protein flightless-1 homolog OS=Mus musculus GN=Flii PE=1 SV=1
1	0.614	0	1	1.628	236	1	SwissProt	MTA70_MOUSE	37	70592	4	1	1	1	0.06	N6-adenosine-methyltransferase subunit METTL3 OS=Mus musculus GN=Mettl3 PE=1 SV=2
1	1.08	0	1	0.926	237	1	SwissProt	PKP1_MOUSE	37	88034	3	1	3	1	0.05	Plakophilin-1 OS=Mus musculus GN=Pkp1 PE=1 SV=1
1	1.834	0	1	0.545	238	1	SwissProt	U520_MOUSE	37	265787	5	1	5	1	0.02	U5 small nuclear ribonucleoprotein 200 kDa helicase OS=Mus musculus GN=Snrnp200 PE=1 SV=1
1	1.225	0	1	0.817	239	1	SwissProt	ODO2_MOUSE	37	53196	2	1	2	1	0.08	Dihydrolipoyllysine-residue succinyltransferase component of 2-oxoglutarate dehydrogenase complex, mitochondrial OS=Mus musculus GN=Dlst PE=1 SV=1
1	1.702	0	1	0.588	240	1	SwissProt	PUR6_MOUSE	36	52761	2	1	2	1	0.08	Multifunctional protein ADE2 OS=Mus musculus GN=Paics PE=1 SV=4
2	1.958	0.3652	2	0.511	241	1	SwissProt	TCPZ_MOUSE	36	65341	4	2	3	2	0.14	T-complex protein 1 subunit zeta OS=Mus musculus GN=Cct6a PE=1 SV=3
1	2.27	0	1	0.44	242	1	SwissProt	ELAV1_MOUSE	36	39055	1	1	1	1	0.11	ELAV-like protein 1 OS=Mus musculus GN=Elavl1 PE=1 SV=2
1	9.004	0	1	0.111	243	1	SwissProt	RS20_MOUSE	35	15496	5	1	5	1	0.31	40S ribosomal protein S20 OS=Mus musculus GN=Rps20 PE=1 SV=1
1	1.735	0	1	0.576	244	1	SwissProt	RAB5A_MOUSE	35	25829	4	1	3	1	0.18	Ras-related protein Rab-5A OS=Mus musculus GN=Rab5a PE=1 SV=1
1	1.64	0	1	0.61	245	1	SwissProt	GAPR1_MOUSE	35	19499	1	1	1	1	0.24	Golgi-associated plant pathogenesis-related protein 1 OS=Mus musculus GN=Glipr2 PE=1 SV=3
1	1.887	0	1	0.53	246	1	SwissProt	ATPB_MOUSE	34	59724	4	1	2	1	0.07	ATP synthase subunit beta, mitochondrial OS=Mus musculus GN=Atp5b PE=1 SV=2
1	7.787	0	1	0.128	247	1	SwissProt	RL10A_MOUSE	34	29683	1	1	1	1	0.15	60S ribosomal protein L10a OS=Mus musculus GN=Rpl10a PE=1 SV=3
1	1.807	0	1	0.553	248	1	SwissProt	IDHP_MOUSE	34	56806	1	1	1	1	0.08	Isocitrate dehydrogenase [NADP], mitochondrial OS=Mus musculus GN=Idh2 PE=1 SV=3
1	1.52	0	1	0.658	249	1	SwissProt	NOP2_MOUSE	34	97617	7	1	5	1	0.04	Probable 28S rRNA (cytosine-C(5))-methyltransferase OS=Mus musculus GN=Nop2 PE=1 SV=1
1	2.061	0	1	0.485	250	1	SwissProt	RRP5_MOUSE	34	233944	3	1	3	1	0.02	Protein RRP5 homolog OS=Mus musculus GN=Pdcd11 PE=1 SV=2
1	1.33	0	1	0.752	251	1	SwissProt	SPR1A_MOUSE	33	19060	1	1	1	1	0.24	Cornifin-A OS=Mus musculus GN=Sprr1a PE=1 SV=1
2	2.043	0.0196	2	0.489	252	1	SwissProt	SC23A_MOUSE	33	91342	2	2	1	1	0.05	Protein transport protein Sec23A OS=Mus musculus GN=Sec23a PE=1 SV=2
1	1.276	0	1	0.784	253	1	SwissProt	CH60_MOUSE	33	69014	1	1	1	1	0.06	60 kDa heat shock protein, mitochondrial OS=Mus musculus GN=Hspd1 PE=1 SV=1
1	1.953	0	1	0.512	254	1	SwissProt	ALDR_MOUSE	33	39942	1	1	1	1	0.11	Aldose reductase OS=Mus musculus GN=Akr1b1 PE=1 SV=3
1	3.091	0	1	0.323	255	1	SwissProt	SSRD_MOUSE	33	20017	1	1	1	1	0.23	Translocon-associated protein subunit delta OS=Mus musculus GN=Ssr4 PE=1 SV=1
---	---	---	---	---	256	1	SwissProt	RS17_MOUSE	32	17589	2	1	2	1	0.27	40S ribosomal protein S17 OS=Mus musculus GN=Rps17 PE=1 SV=2
1	8.151	0	1	0.123	257	1	SwissProt	ARC1B_MOUSE	32	45727	8	1	5	1	0.1	Actin-related protein 2/3 complex subunit 1B OS=Mus musculus GN=Arpc1b PE=1 SV=4
1	1.448	0	1	0.691	258	1	SwissProt	HNRLL_MOUSE	32	69983	2	1	2	1	0.06	Heterogeneous nuclear ribonucleoprotein L-like OS=Mus musculus GN=Hnrnpll PE=1 SV=3
1	3.153	0	1	0.317	259	1	SwissProt	ADRM1_MOUSE	32	45258	1	1	1	1	0.1	Proteasomal ubiquitin receptor ADRM1 OS=Mus musculus GN=Adrm1 PE=1 SV=2
1	1.161	0	1	0.861	260	1	SwissProt	SFXN3_MOUSE	32	37254	2	1	2	1	0.12	Sideroflexin-3 OS=Mus musculus GN=Sfxn3 PE=1 SV=1
1	2.599	0	1	0.385	261	1	SwissProt	TMPSD_MOUSE	32	64166	2	1	1	1	0.07	Transmembrane protease serine 13 OS=Mus musculus GN=Tmprss13 PE=2 SV=2
1	1.113	0	1	0.899	262	1	SwissProt	MYPR_MOUSE	31	32729	1	1	1	1	0.14	Myelin proteolipid protein OS=Mus musculus GN=Plp1 PE=1 SV=2
1	1.975	0	1	0.506	263	1	SwissProt	NO40_MOUSE	30	34338	2	1	2	1	0.13	Nucleolar protein of 40 kDa OS=Mus musculus GN=Zcchc17 PE=1 SV=1
1	1.646	0	1	0.608	264	1	SwissProt	DDX18_MOUSE	30	85428	6	1	3	1	0.05	ATP-dependent RNA helicase DDX18 OS=Mus musculus GN=Ddx18 PE=1 SV=1
1	1.935	0	1	0.517	265	1	SwissProt	HXK1_MOUSE	30	118768	2	1	2	1	0.04	Hexokinase-1 OS=Mus musculus GN=Hk1 PE=1 SV=3
1	1.924	0	1	0.52	266	1	SwissProt	RL35A_MOUSE	30	14389	2	1	2	1		60S ribosomal protein L35a OS=Mus musculus GN=Rpl35a PE=1 SV=2
1	2.007	0	1	0.498	267	1	SwissProt	NAT10_MOUSE	30	126922	4	1	3	1	0.03	RNA cytidine acetyltransferase OS=Mus musculus GN=Nat10 PE=1 SV=1
1	4.911	0	1	0.204	268	1	SwissProt	H2A1B_MOUSE	29	16144	1	1	1	1		Histone H2A type 1-B OS=Mus musculus GN=Hist1h2ab PE=1 SV=1
1	2.401	0	1	0.417	269	1	SwissProt	ECHA_MOUSE	29	92957	5	1	4	1	0.05	Trifunctional enzyme subunit alpha, mitochondrial OS=Mus musculus GN=Hadha PE=1 SV=1
1	2.128	0	1	0.47	270	1	SwissProt	I20L2_MOUSE	29	49319	2	1	2	1	0.09	Interferon-stimulated 20 kDa exonuclease-like 2 OS=Mus musculus GN=Isg20l2 PE=1 SV=2
1	1.551	0	1	0.645	271	1	SwissProt	ETFA_MOUSE	29	39220	1	1	1	1	0.11	Electron transfer flavoprotein subunit alpha, mitochondrial OS=Mus musculus GN=Etfa PE=1 SV=2
3	1.764	0.01269	3	0.567	272	1	SwissProt	RL22_MOUSE	29	17689	3	3	2	2	0.6	60S ribosomal protein L22 OS=Mus musculus GN=Rpl22 PE=1 SV=2
1	1.516	0	1	0.66	273	1	SwissProt	ETFB_MOUSE	28	31725	2	1	1	1	0.14	Electron transfer flavoprotein subunit beta OS=Mus musculus GN=Etfb PE=1 SV=3
1	3.924	0	1	0.255	274	1	SwissProt	NFS1_MOUSE	28	54107	2	1	1	1	0.08	Cysteine desulfurase, mitochondrial OS=Mus musculus GN=Nfs1 PE=1 SV=3
1	2.368	0	1	0.422	275	1	SwissProt	RS3_MOUSE	28	29855	4	1	4	1	0.15	40S ribosomal protein S3 OS=Mus musculus GN=Rps3 PE=1 SV=1
2	1.956	0.02845	2	0.511	276	1	SwissProt	EF1G_MOUSE	28	55271	3	2	3	2	0.16	Elongation factor 1-gamma OS=Mus musculus GN=Eef1g PE=1 SV=3
1	2.002	0	1	0.499	277	1	SwissProt	RL27_MOUSE	28	19246	3	1	3	1	0.24	60S ribosomal protein L27 OS=Mus musculus GN=Rpl27 PE=1 SV=2
1	2.168	0	1	0.461	278	1	SwissProt	PTMA_MOUSE	28	13544	1	1	1	1	0.36	Prothymosin alpha OS=Mus musculus GN=Ptma PE=1 SV=2
1	1.668	0	1	0.6	279	1	SwissProt	SMCA4_MOUSE	28	200416	2	1	1	1	0.02	Transcription activator BRG1 OS=Mus musculus GN=Smarca4 PE=1 SV=1
1	2.478	0	1	0.403	280	1	SwissProt	TCPQ_MOUSE	27	66428	4	1	3	1	0.07	T-complex protein 1 subunit theta OS=Mus musculus GN=Cct8 PE=1 SV=3
1	1.828	0	1	0.547	281	1	SwissProt	CO1A2_MOUSE	27	137053	3	1	3	1	0.03	Collagen alpha-2(I) chain OS=Mus musculus GN=Col1a2 PE=1 SV=2
1	1.972	0	1	0.507	282	1	SwissProt	SRSF3_MOUSE	27	20411	2	1	2	1	0.23	Serine/arginine-rich splicing factor 3 OS=Mus musculus GN=Srsf3 PE=1 SV=1
1	2.599	0	1	0.385	283	1	SwissProt	S10AB_MOUSE	27	12543	1	1	1	1	0.39	Protein S100-A11 OS=Mus musculus GN=S100a11 PE=1 SV=1
1	3.581	0	1	0.279	284	1	SwissProt	RL12_MOUSE	27	20270	1	1	1	1	0.23	60S ribosomal protein L12 OS=Mus musculus GN=Rpl12 PE=1 SV=2
1	1.685	0	1	0.594	285	1	SwissProt	DSG1C_MOUSE	27	105828	5	1	2	1	0.04	Desmoglein-1-gamma OS=Mus musculus GN=Dsg1c PE=1 SV=1
1	1.617	0	1	0.619	286	1	SwissProt	NSDHL_MOUSE	27	44404	1	1	1	1	0.1	Sterol-4-alpha-carboxylate 3-dehydrogenase, decarboxylating OS=Mus musculus GN=Nsdhl PE=1 SV=1
1	2.494	0	1	0.401	287	1	SwissProt	RS11_MOUSE	26	21760	3	1	3	1	0.21	40S ribosomal protein S11 OS=Mus musculus GN=Rps11 PE=1 SV=3
1	1.648	0	1	0.607	288	1	SwissProt	ACSL4_MOUSE	26	89590	3	1	2	1	0.05	Long-chain-fatty-acid--CoA ligase 4 OS=Mus musculus GN=Acsl4 PE=1 SV=2
1	1.331	0	1	0.752	289	1	SwissProt	TCPH_MOUSE	26	66324	3	1	3	1	0.07	T-complex protein 1 subunit eta OS=Mus musculus GN=Cct7 PE=1 SV=1
1	1.745	0	1	0.573	290	1	SwissProt	FKB1A_MOUSE	25	13269	1	1	1	1	0.36	Peptidyl-prolyl cis-trans isomerase FKBP1A OS=Mus musculus GN=Fkbp1a PE=1 SV=2
1	2.126	0	1	0.47	291	1	SwissProt	RS21_MOUSE	25	10114	2	1	1	1	0.5	40S ribosomal protein S21 OS=Mus musculus GN=Rps21 PE=1 SV=1
1	1.529	0	1	0.654	292	1	SwissProt	GCN1_MOUSE	25	318396	10	1	9	1	0.01	eIF-2-alpha kinase activator GCN1 OS=Mus musculus GN=Gcn1 PE=1 SV=1
1	3.951	0	1	0.253	293	1	SwissProt	HSPB1_MOUSE	25	24210	2	1	2	1	0.19	Heat shock protein beta-1 OS=Mus musculus GN=Hspb1 PE=1 SV=3
2	3.822	0.201	2	0.262	294	1	SwissProt	F120A_MOUSE	25	130980	4	2	3	1	0.03	Constitutive coactivator of PPAR-gamma-like protein 1 OS=Mus musculus GN=FAM120A PE=1 SV=2
1	1.728	0	1	0.579	295	1	SwissProt	CYR61_MOUSE	25	48027	3	1	3	1	0.09	Protein CYR61 OS=Mus musculus GN=Cyr61 PE=1 SV=1
1	0.749	0	1	1.335	296	1	SwissProt	PCBP1_MOUSE	24	40149	2	1	2	1	0.11	Poly(rC)-binding protein 1 OS=Mus musculus GN=Pcbp1 PE=1 SV=1
1	2.194	0	1	0.456	297	1	SwissProt	FOCAD_MOUSE	24	213207	2	1	2	1	0.02	Focadhesin OS=Mus musculus GN=Focad PE=1 SV=1
1	2.275	0	1	0.439	298	1	SwissProt	TSP1_MOUSE	24	141913	3	1	3	1	0.03	Thrombospondin-1 OS=Mus musculus GN=Thbs1 PE=1 SV=1
1	1.738	0	1	0.576	299	1	SwissProt	DOK1_MOUSE	24	56421	1	1	1	1	0.08	Docking protein 1 OS=Mus musculus GN=Dok1 PE=1 SV=2
1	1.903	0	1	0.525	300	1	SwissProt	SAHH2_MOUSE	23	65617	2	1	1	1	0.07	S-adenosylhomocysteine hydrolase-like protein 1 OS=Mus musculus GN=Ahcyl1 PE=1 SV=1
1	1.694	0	1	0.59	301	1	SwissProt	ACADM_MOUSE	23	51375	5	1	4	1	0.09	Medium-chain specific acyl-CoA dehydrogenase, mitochondrial OS=Mus musculus GN=Acadm PE=1 SV=1
1	2.465	0	1	0.406	302	1	SwissProt	CNN2_MOUSE	23	36760	4	1	4	1	0.12	Calponin-2 OS=Mus musculus GN=Cnn2 PE=1 SV=1
1	3.918	0	1	0.255	303	1	SwissProt	STT3B_MOUSE	23	99952	5	1	3	1	0.04	Dolichyl-diphosphooligosaccharide--protein glycosyltransferase subunit STT3B OS=Mus musculus GN=Stt3b PE=1 SV=2
1	1.913	0	1	0.523	304	1	SwissProt	ADNP_MOUSE	23	140035	1	1	1	1	0.03	Activity-dependent neuroprotector homeobox protein OS=Mus musculus GN=Adnp PE=1 SV=2
1	0.964	0	1	1.037	305	1	SwissProt	UBA1_MOUSE	22	126857	2	1	2	1	0.03	Ubiquitin-like modifier-activating enzyme 1 OS=Mus musculus GN=Uba1 PE=1 SV=1
2	1.69	0.137	2	0.592	306	1	SwissProt	SYK_MOUSE	22	75170	3	2	2	1	0.06	Lysine--tRNA ligase OS=Mus musculus GN=Kars PE=1 SV=1
1	1.834	0	1	0.545	307	1	SwissProt	THIO_MOUSE	22	13883	1	1	1	1	0.35	Thioredoxin OS=Mus musculus GN=Txn PE=1 SV=3
1	1.983	0	1	0.504	308	1	SwissProt	PRPF3_MOUSE	22	89106	3	1	2	1	0.05	U4/U6 small nuclear ribonucleoprotein Prp3 OS=Mus musculus GN=Prpf3 PE=1 SV=1
1	1.861	0	1	0.537	309	1	SwissProt	GREM1_MOUSE	22	23659	1	1	1	1	0.19	Gremlin-1 OS=Mus musculus GN=Grem1 PE=2 SV=1
1	1.974	0	1	0.507	310	1	SwissProt	FXR1_MOUSE	21	82714	3	1	3	1	0.05	Fragile X mental retardation syndrome-related protein 1 OS=Mus musculus GN=Fxr1 PE=1 SV=2
1	2.15	0	1	0.465	311	1	SwissProt	PRDX2_MOUSE	21	23954	4	1	3	1	0.19	Peroxiredoxin-2 OS=Mus musculus GN=Prdx2 PE=1 SV=3
3	1.165	---	3	0.858	312	1	SwissProt	FBX16_MOUSE	21	43685	13	3	1	1	0.1	F-box only protein 16 OS=Mus musculus GN=Fbxo16 PE=2 SV=1
1	2.274	0	1	0.44	313	1	SwissProt	PP1A_MOUSE	20	41427	3	1	2	1	0.11	Serine/threonine-protein phosphatase PP1-alpha catalytic subunit OS=Mus musculus GN=Ppp1ca PE=1 SV=1
1	1.636	0	1	0.611	314	1	SwissProt	NNTM_MOUSE	20	123384	5	1	5	1	0.03	NAD(P) transhydrogenase, mitochondrial OS=Mus musculus GN=Nnt PE=1 SV=2
1	2.324	0	1	0.43	315	1	SwissProt	CCR9_MOUSE	20	45796	1	1	1	1	0.1	C-C chemokine receptor type 9 OS=Mus musculus GN=Ccr9 PE=2 SV=1
1	2.167	0	1	0.462	316	1	SwissProt	EIF3D_MOUSE	20	70196	4	1	3	1	0.06	Eukaryotic translation initiation factor 3 subunit D OS=Mus musculus GN=Eif3d PE=1 SV=2
1	2.892	0	1	0.346	317	1	SwissProt	CAZA2_MOUSE	20	36288	2	1	2	1	0.12	F-actin-capping protein subunit alpha-2 OS=Mus musculus GN=Capza2 PE=1 SV=3
1	1.887	0	1	0.53	318	1	SwissProt	PCCB_MOUSE	20	62602	1	1	1	1	0.07	Propionyl-CoA carboxylase beta chain, mitochondrial OS=Mus musculus GN=Pccb PE=1 SV=2
1	2.405	0	1	0.416	319	1	SwissProt	FBRL_MOUSE	20	37282	2	1	2	1	0.12	rRNA 2'-O-methyltransferase fibrillarin OS=Mus musculus GN=Fbl PE=1 SV=2
1	3.929	0	1	0.255	320	1	SwissProt	IF5A1_MOUSE	20	19067	3	1	2	1	0.24	Eukaryotic translation initiation factor 5A-1 OS=Mus musculus GN=Eif5a PE=1 SV=2
1	1.375	0	1	0.727	321	1	SwissProt	GLRX5_MOUSE	20	17837	1	1	1	1	0.26	Glutaredoxin-related protein 5, mitochondrial OS=Mus musculus GN=Glrx5 PE=1 SV=2
1	1.735	0	1	0.576	322	1	SwissProt	SRRM2_MOUSE	20	315407	13	1	10	1	0.01	Serine/arginine repetitive matrix protein 2 OS=Mus musculus GN=Srrm2 PE=1 SV=3
1	1.358	0	1	0.736	323	1	SwissProt	EPT1_MOUSE	19	47503	1	1	1	1	0.09	Ethanolaminephosphotransferase 1 OS=Mus musculus GN=Selenoi PE=2 SV=3
1	2.015	0	1	0.496	324	1	SwissProt	SC23B_MOUSE	19	91761	2	1	2	1	0.05	Protein transport protein Sec23B OS=Mus musculus GN=Sec23b PE=1 SV=1
1	1.662	0	1	0.602	325	1	SwissProt	NU155_MOUSE	19	165061	4	1	3	1	0.03	Nuclear pore complex protein Nup155 OS=Mus musculus GN=Nup155 PE=1 SV=1
1	1.42	0	1	0.704	326	1	SwissProt	ACATN_MOUSE	19	65728	2	1	2	1	0.07	Acetyl-coenzyme A transporter 1 OS=Mus musculus GN=Slc33a1 PE=1 SV=1
1	1.393	0	1	0.718	327	1	SwissProt	TOP2B_MOUSE	19	209799	6	1	5	1	0.02	DNA topoisomerase 2-beta OS=Mus musculus GN=Top2b PE=1 SV=2
1	1.113	0	1	0.898	328	1	SwissProt	RAN_MOUSE	19	27317	4	1	3	1	0.17	GTP-binding nuclear protein Ran OS=Mus musculus GN=Ran PE=1 SV=3
1	2.176	0	1	0.46	329	1	SwissProt	ABCE1_MOUSE	19	76022	1	1	1	1	0.06	ATP-binding cassette sub-family E member 1 OS=Mus musculus GN=Abce1 PE=1 SV=1
1	1.652	0	1	0.605	330	1	SwissProt	H2AY_MOUSE	19	46798	3	1	3	1	0.09	Core histone macro-H2A.1 OS=Mus musculus GN=H2afy PE=1 SV=3
1	3.846	0	1	0.26	331	1	SwissProt	SFR19_MOUSE	18	146205	2	1	2	1	0.03	Splicing factor, arginine/serine-rich 19 OS=Mus musculus GN=Scaf1 PE=1 SV=1
1	2.227	0	1	0.449	332	1	SwissProt	RS5_MOUSE	18	25496	1	1	1	1	0.18	40S ribosomal protein S5 OS=Mus musculus GN=Rps5 PE=1 SV=3
