# Supplementary figures and images for: Styxl2 regulates de novo sarcomere assembly by binding to non-muscle myosin IIs and promoting their degradation
Source: eLife journal article supplement (doi:10.7554/elife.87434), 2023-05-05

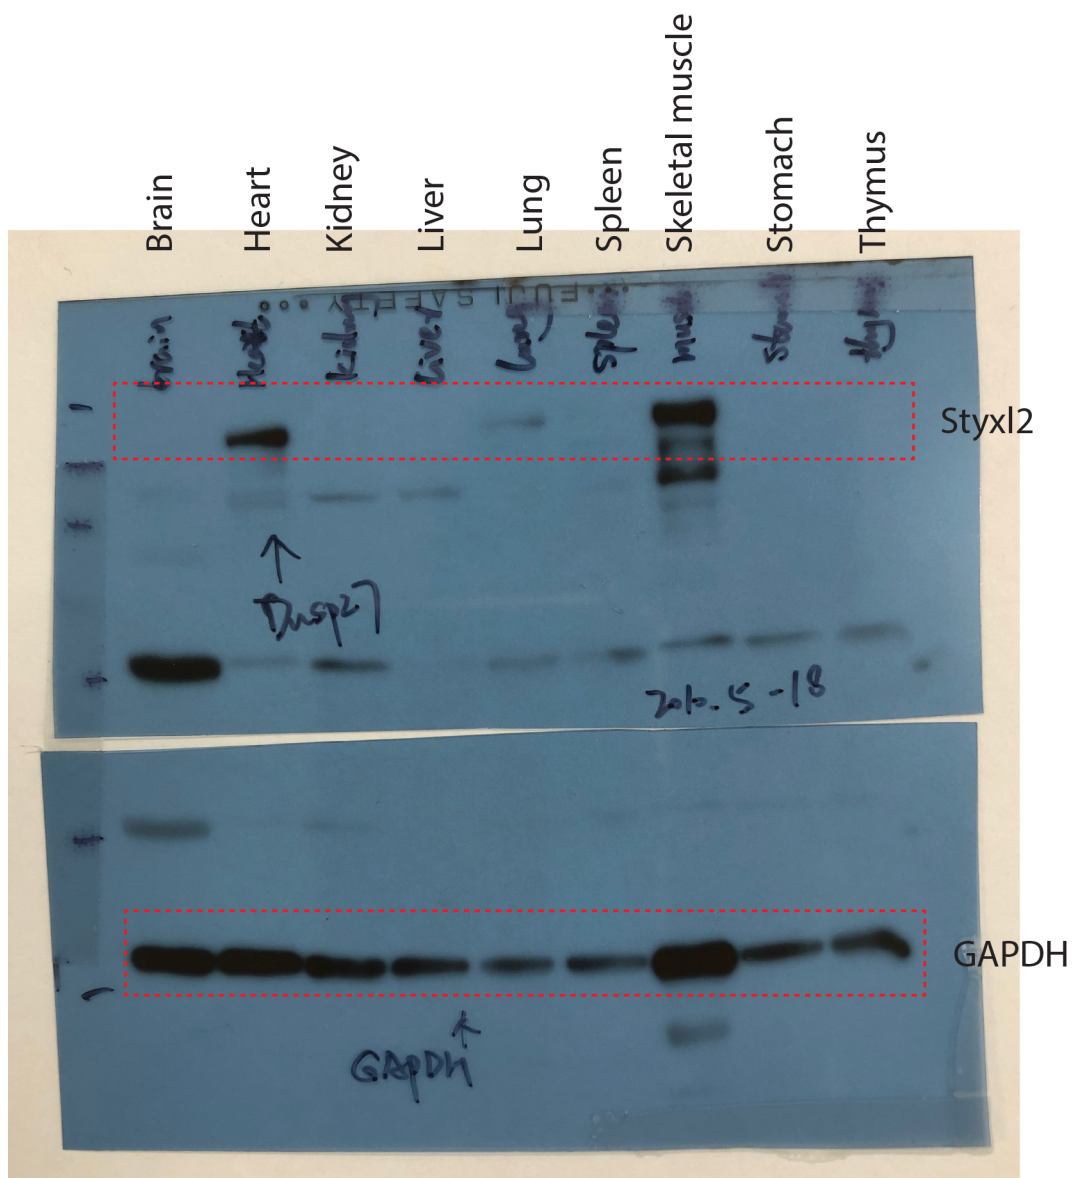

Supplement: fig1-data2 [file elife-87434-fig1-data2-v1.zip]

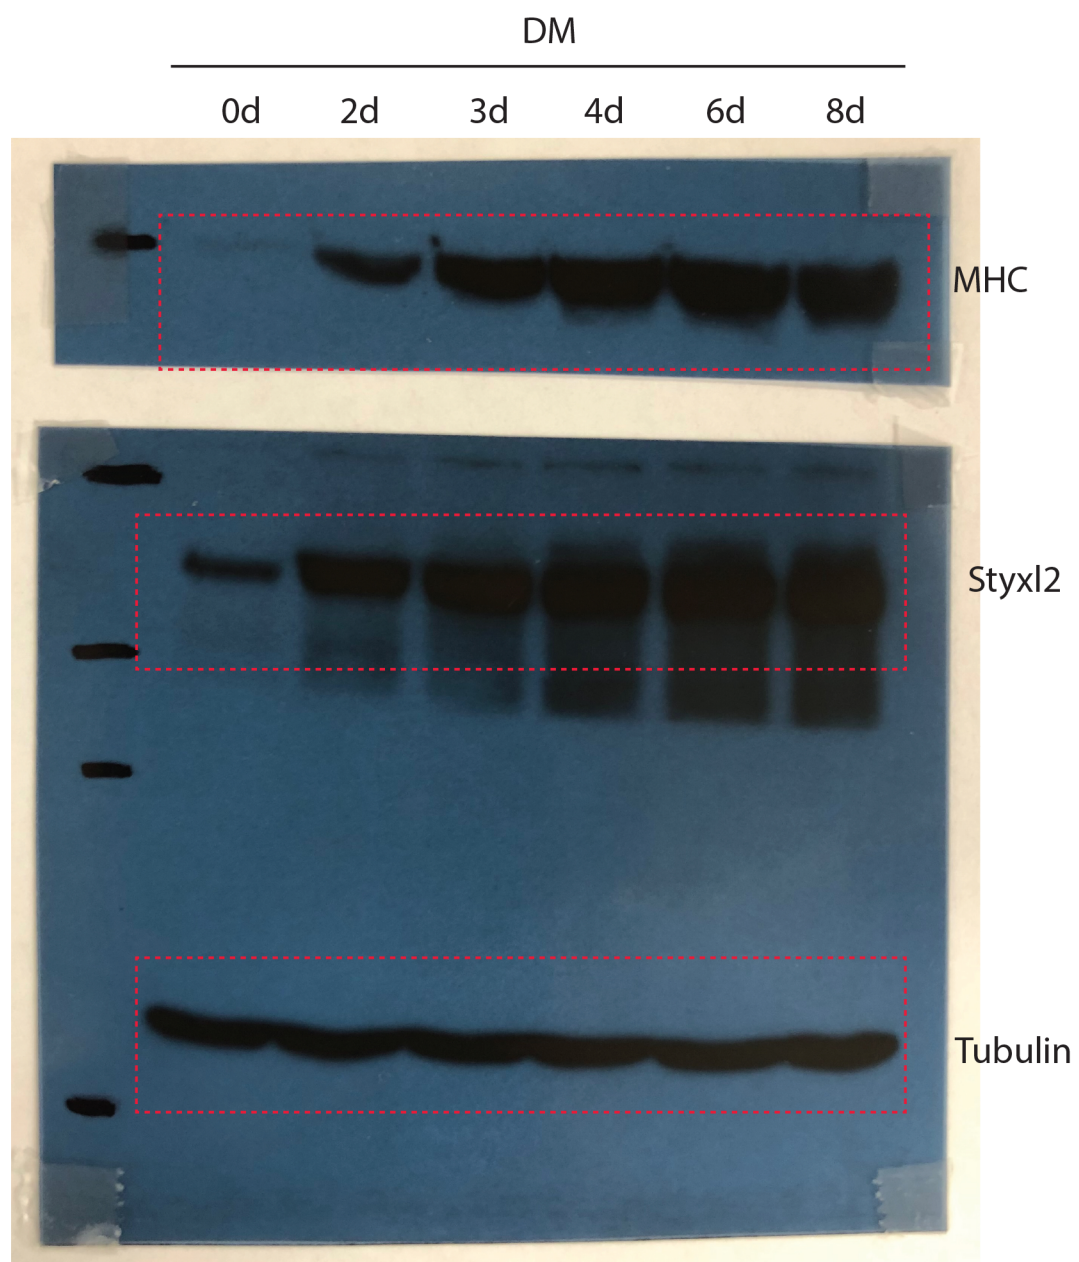

Supplement: fig1-data4 [file elife-87434-fig1-data4-v1.zip]

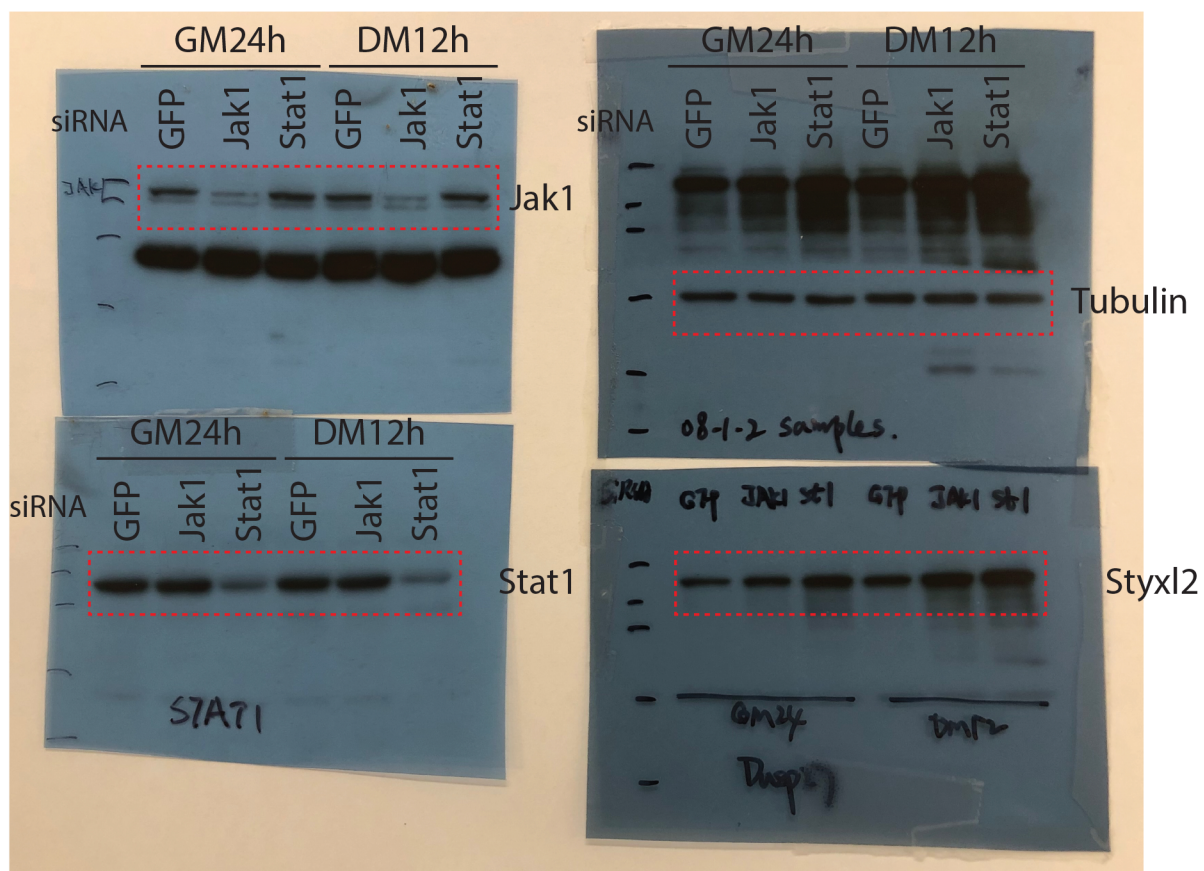

Supplement: fig1-figsupp1-data2 [file elife-87434-fig1-figsupp1-data2-v1.zip]

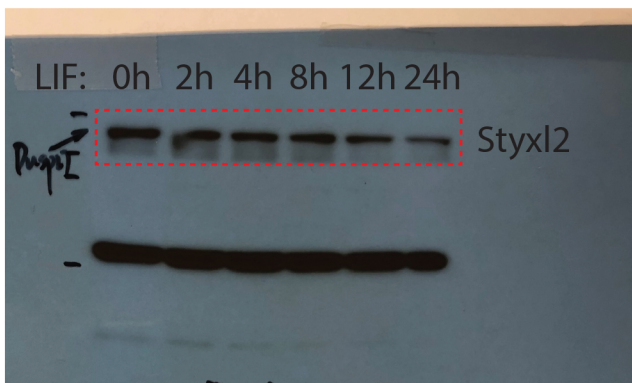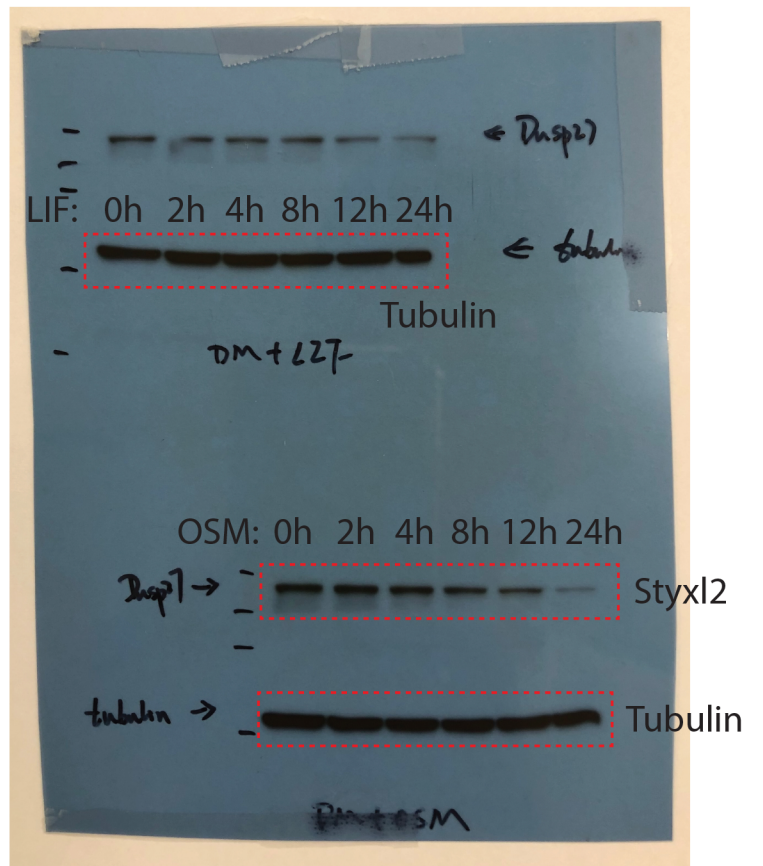

Supplement: fig1-figsupp1-data5 [file elife-87434-fig1-figsupp1-data5-v1.zip]

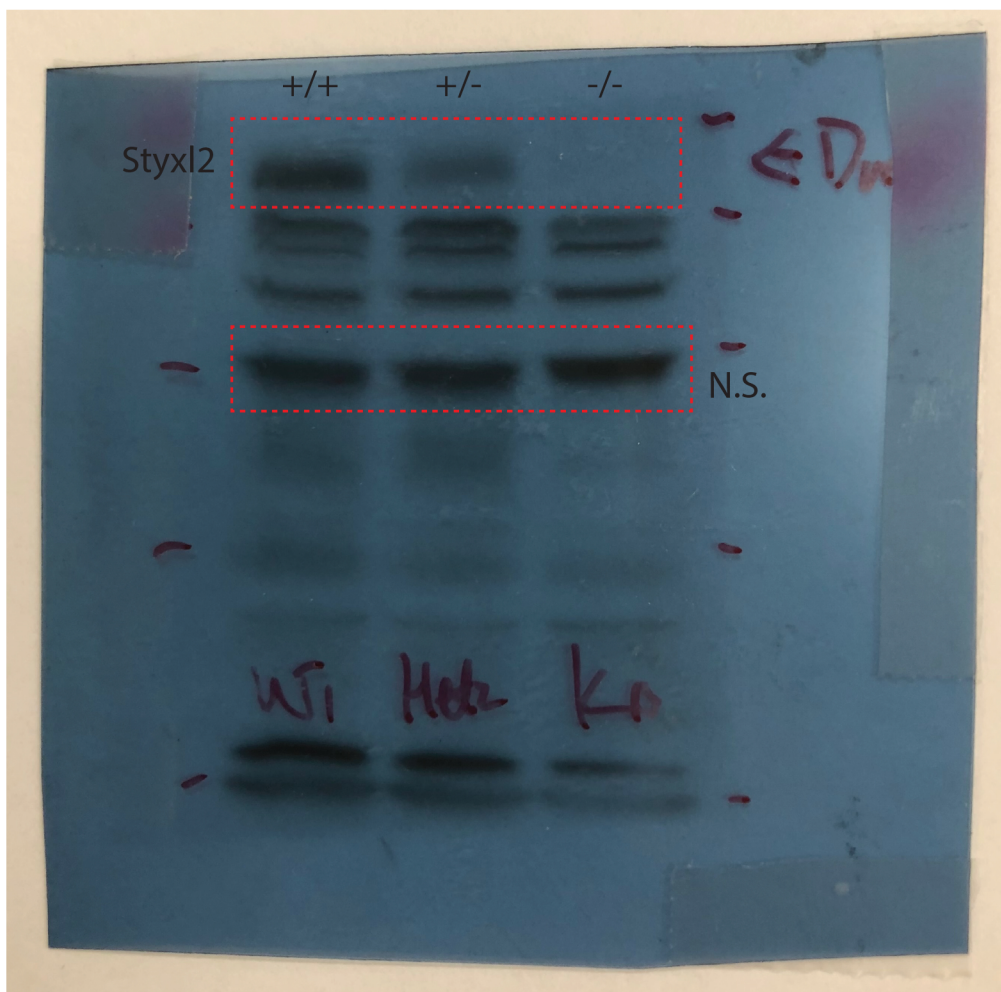

Supplement: fig2-data2 [file elife-87434-fig2-data2-v1.zip]

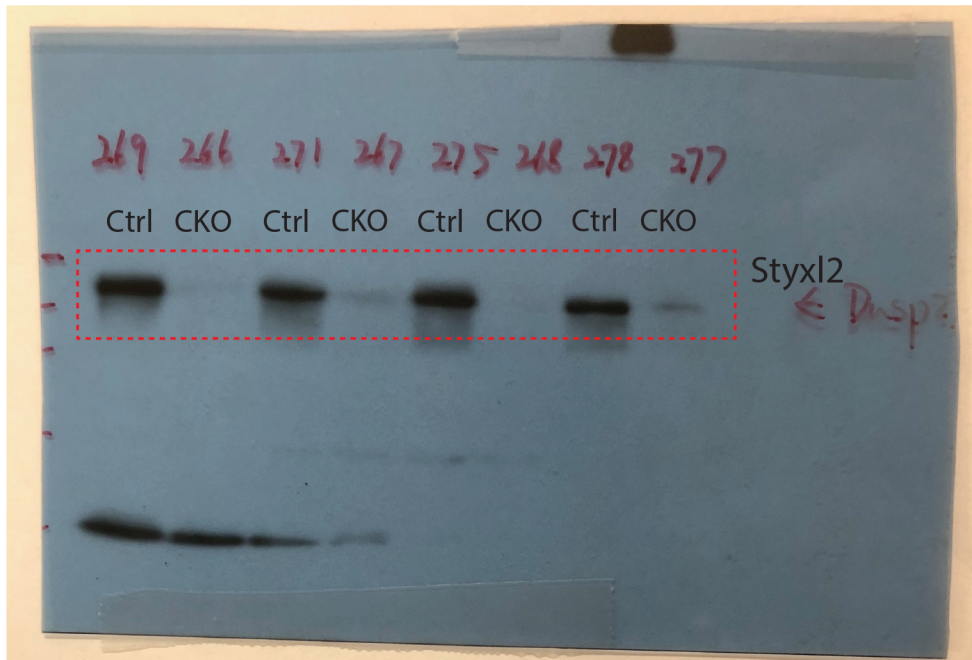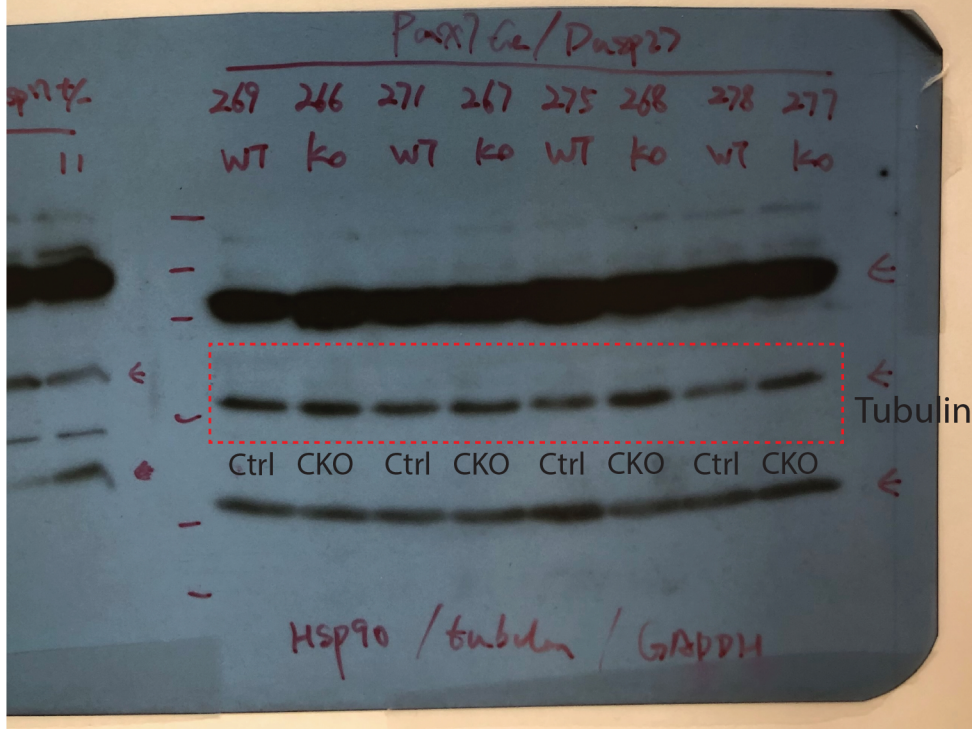

Supplement: fig2-data4 [file elife-87434-fig2-data4-v1.zip]

Ctrl

MF-iKO

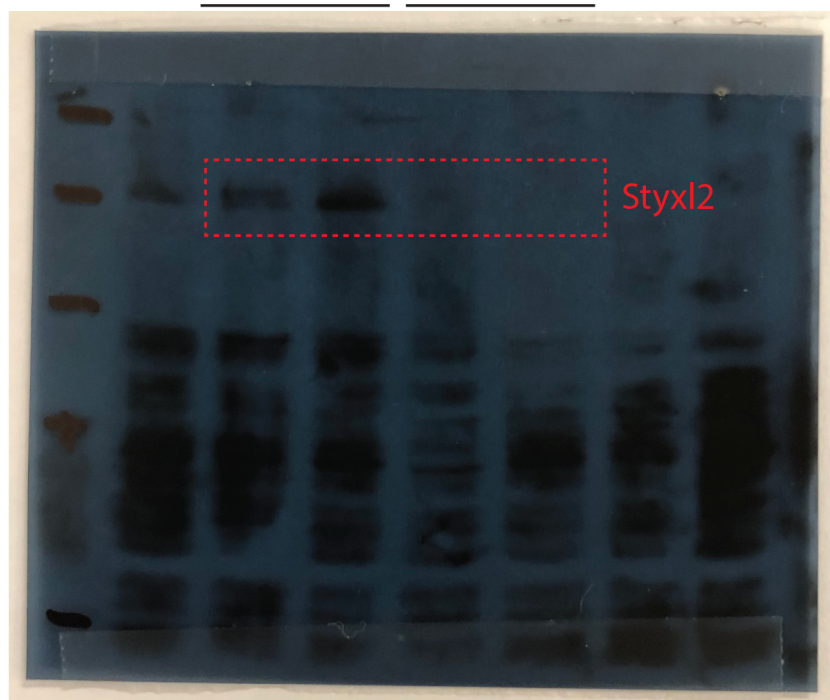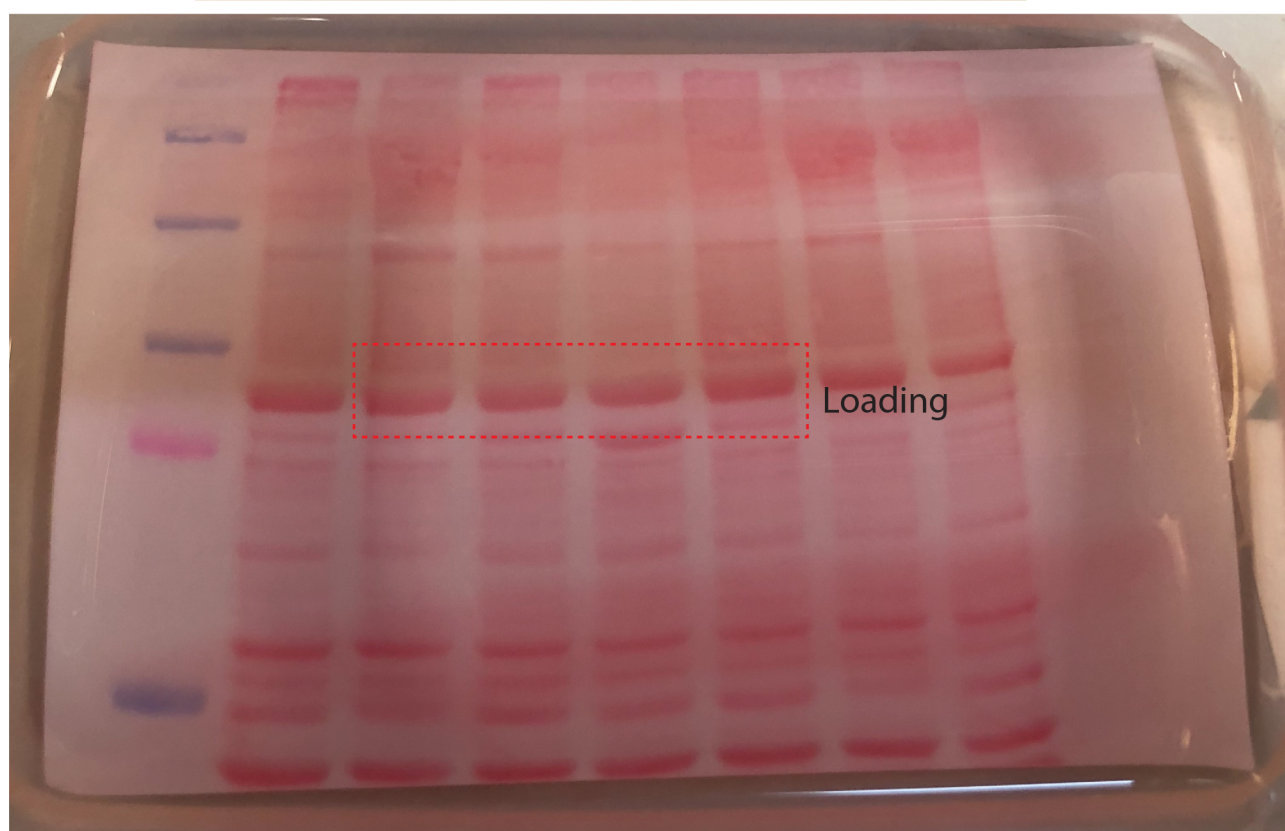

Supplement: fig3-data2 [file elife-87434-fig3-data2-v1.zip]

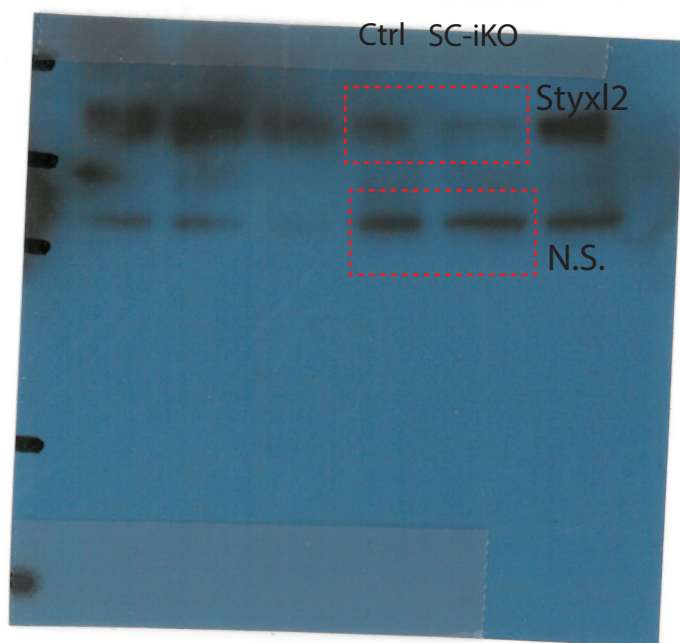

Supplement: fig3-data4 [file elife-87434-fig3-data4-v1.zip]

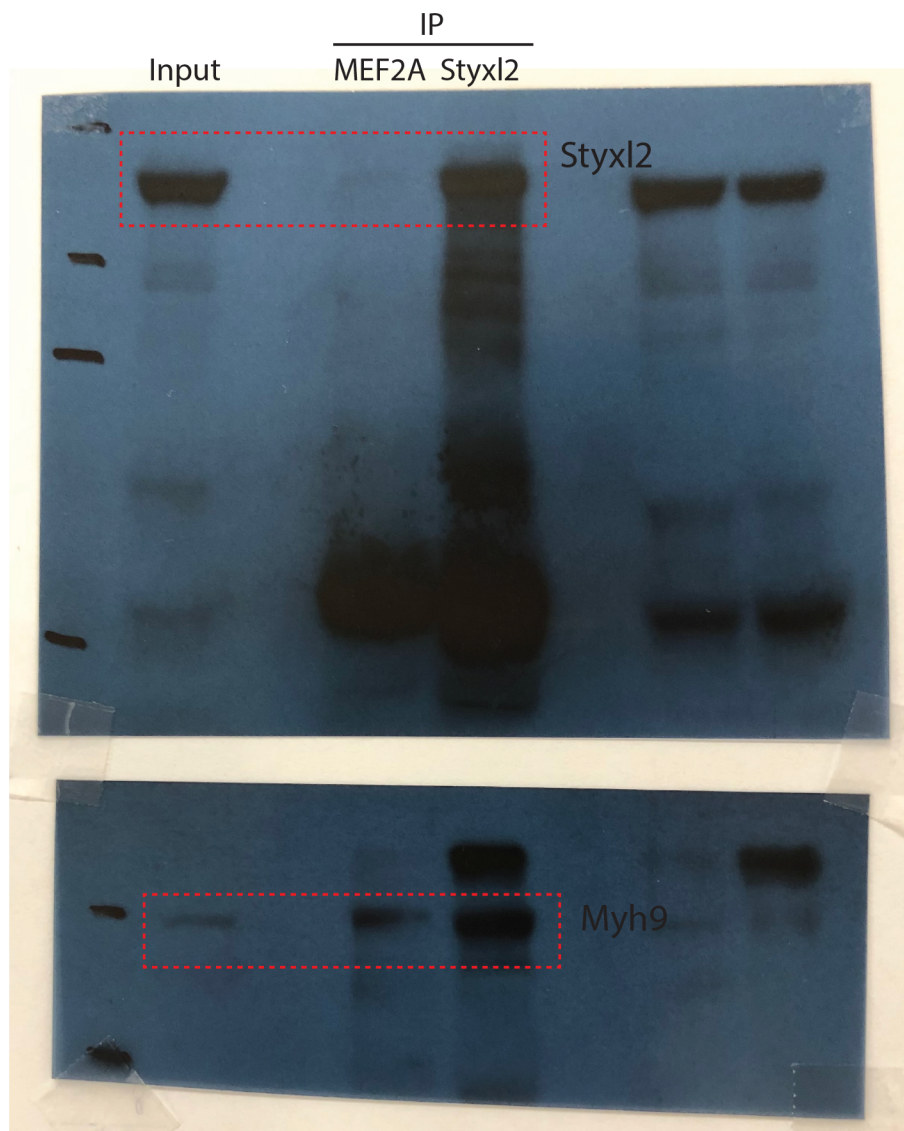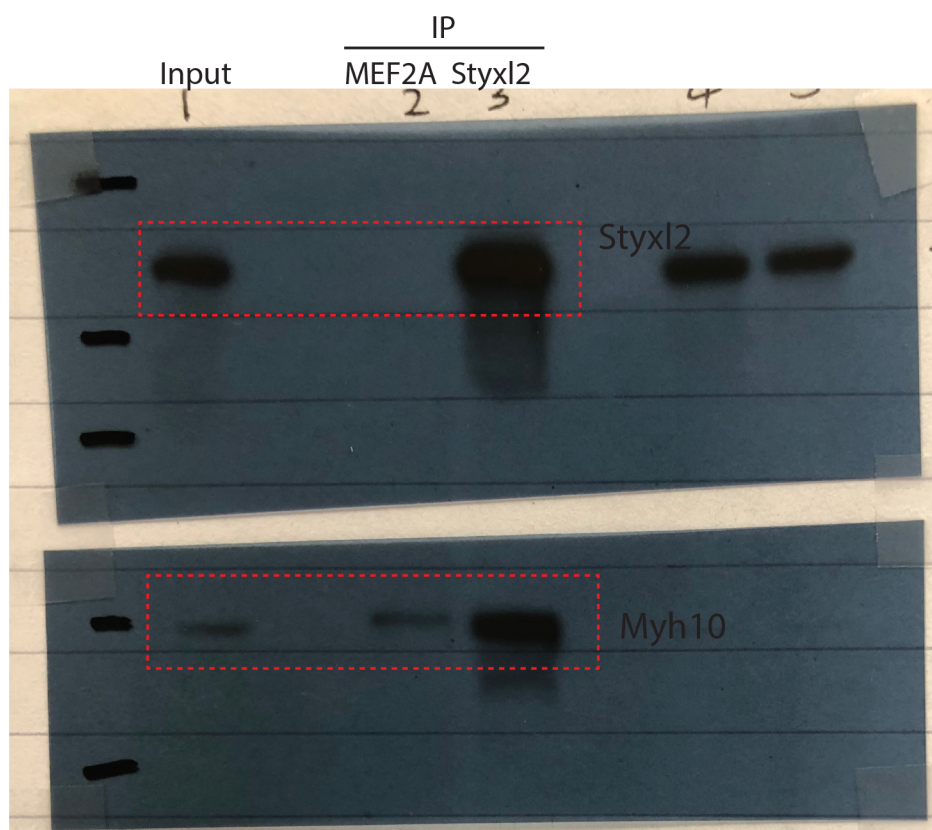

Supplement: fig4-data2 [file elife-87434-fig4-data2-v1.zip]

|               |   |   |   |   |   |   |   |   |
|---------------|---|---|---|---|---|---|---|---|
| Flag-Styxl2   | + | + | + | + | + | + | + | + |
| HA-Myh9-head  | + | - | - | - | + | - | - | - |
| HA-Myh9-tail  | - | + | - | - | - | + | - | - |
| HA-Myh10-head | - | - | + | - | - | - | + | - |
| HA-Myh10-tail | - | - | - | + | - | - | - | + |

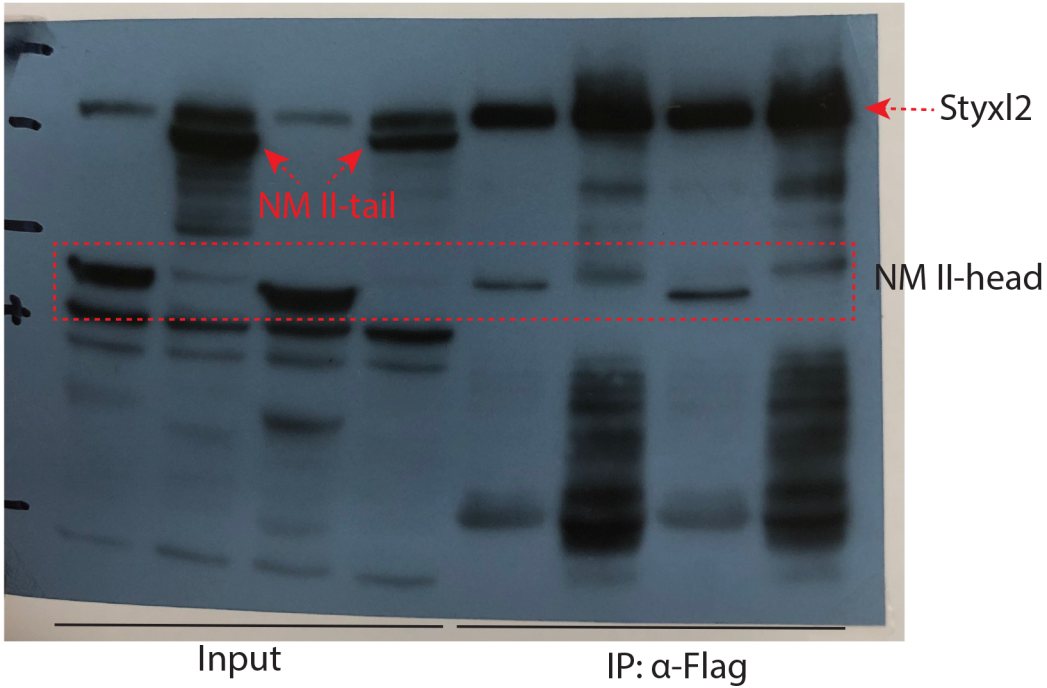

Supplement: fig4-data4 [file elife-87434-fig4-data4-v1.zip]

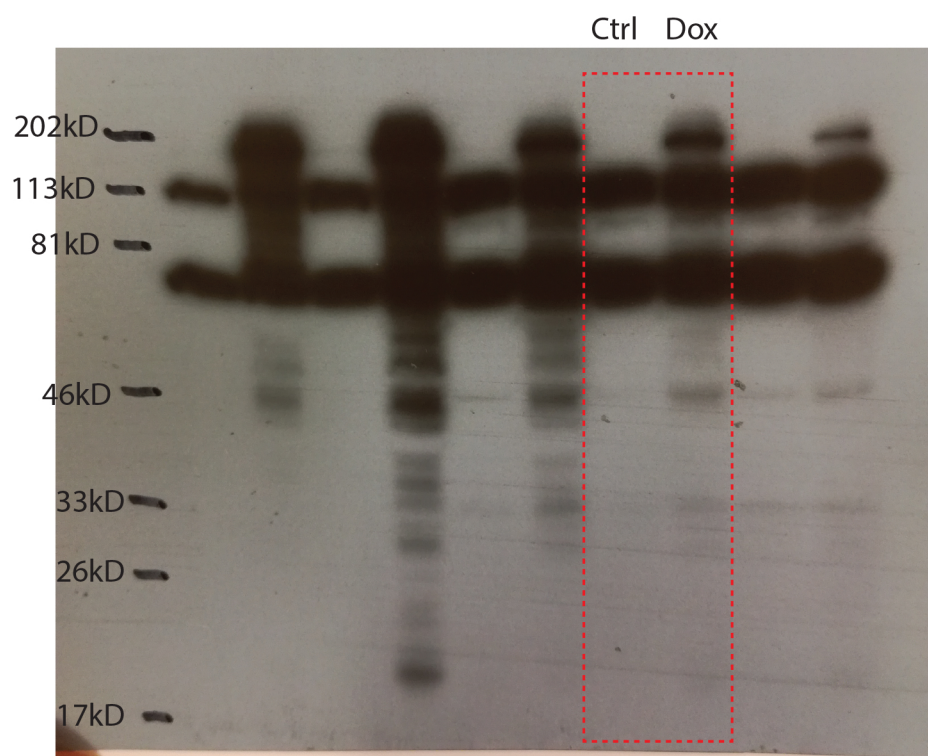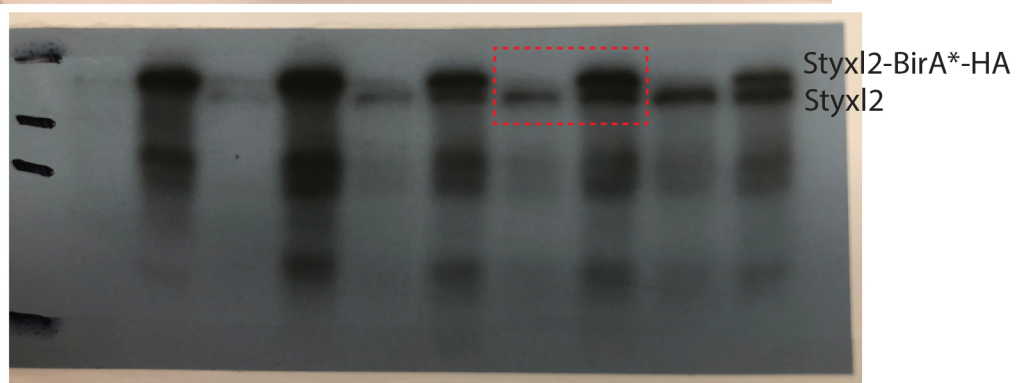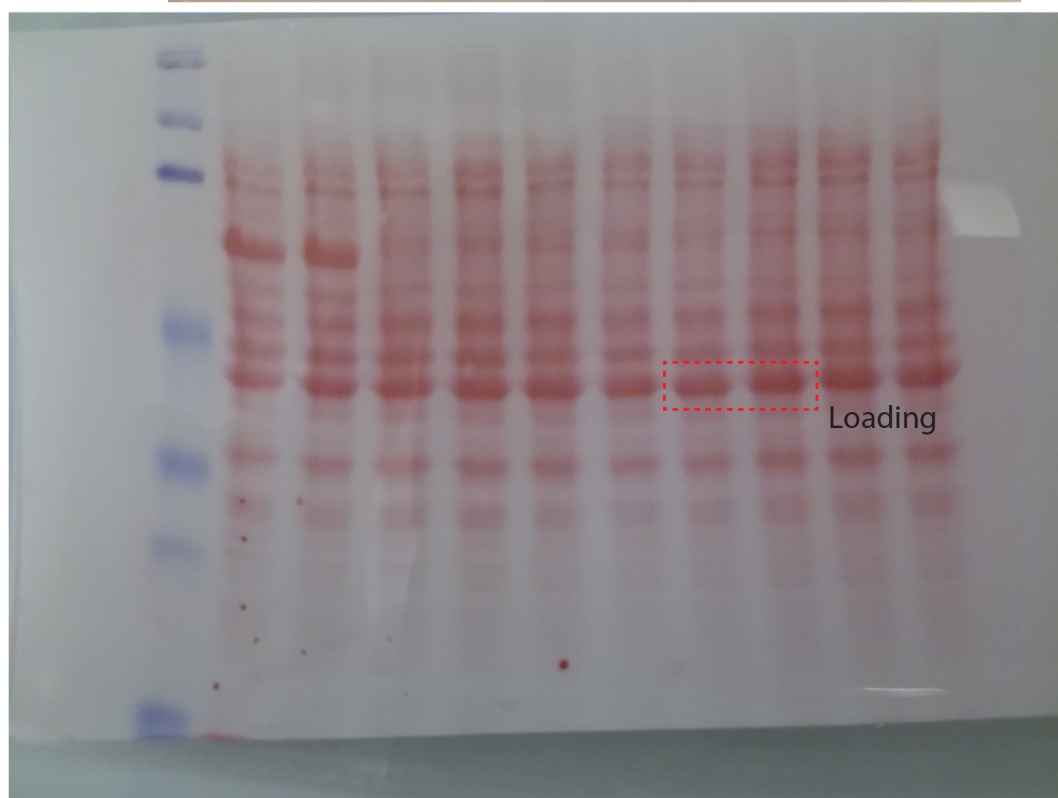

Supplement: fig4-figsupp1-data2 [file elife-87434-fig4-figsupp1-data2-v1.zip]

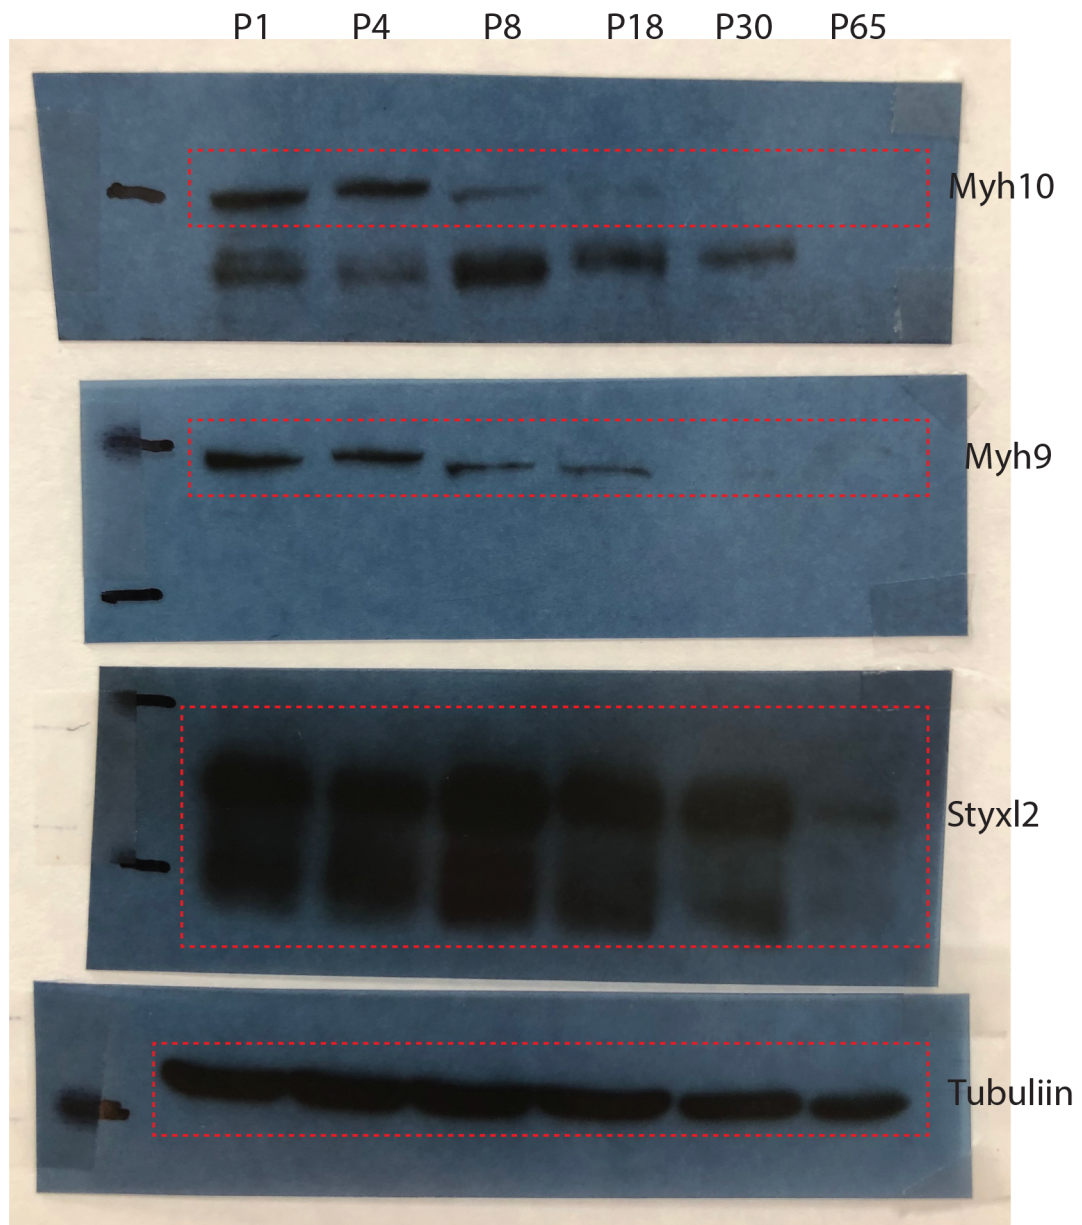

Supplement: fig5-data2 [file elife-87434-fig5-data2-v1.zip]

Ctrl

CKO

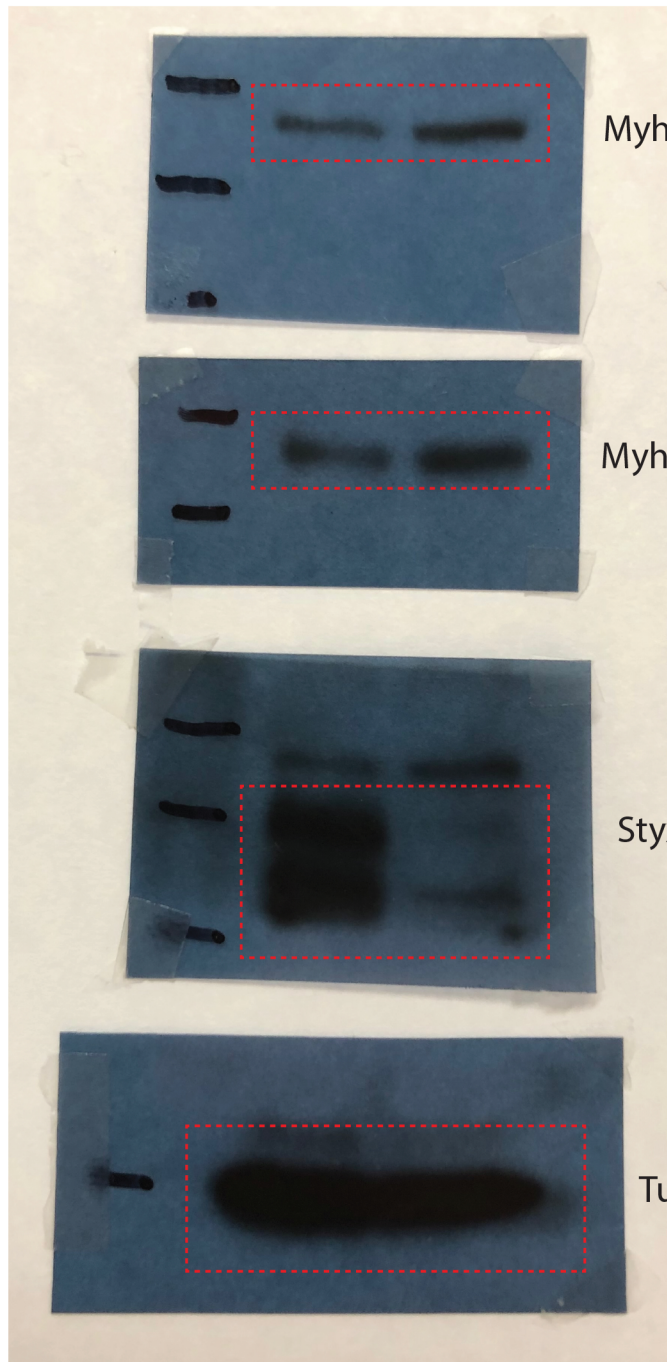

Myh9

Myh10

Styxl2

Tubulin

Supplement: fig5-data4 [file elife-87434-fig5-data4-v1.zip]

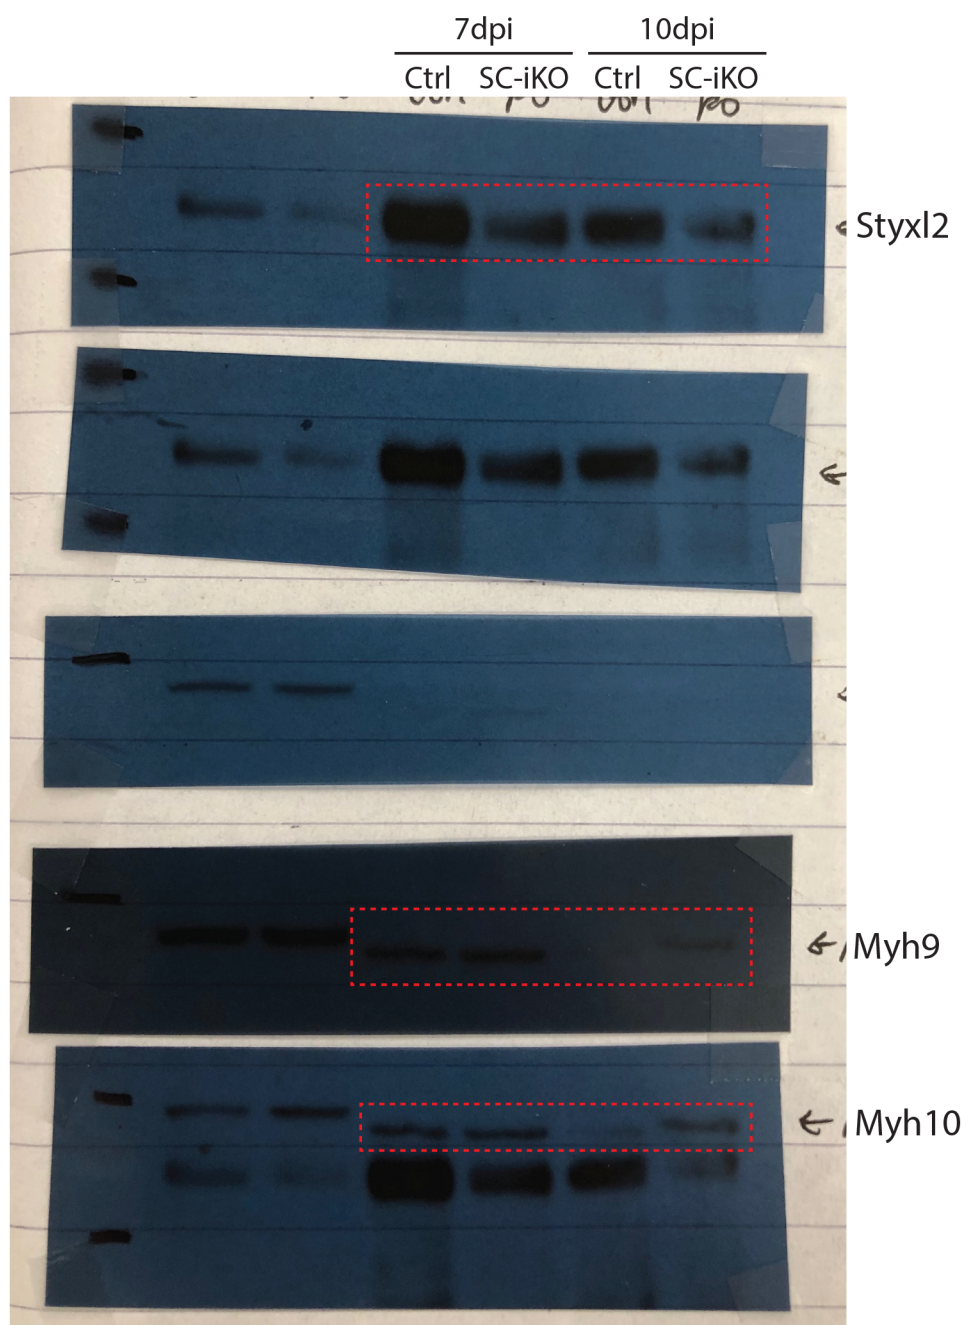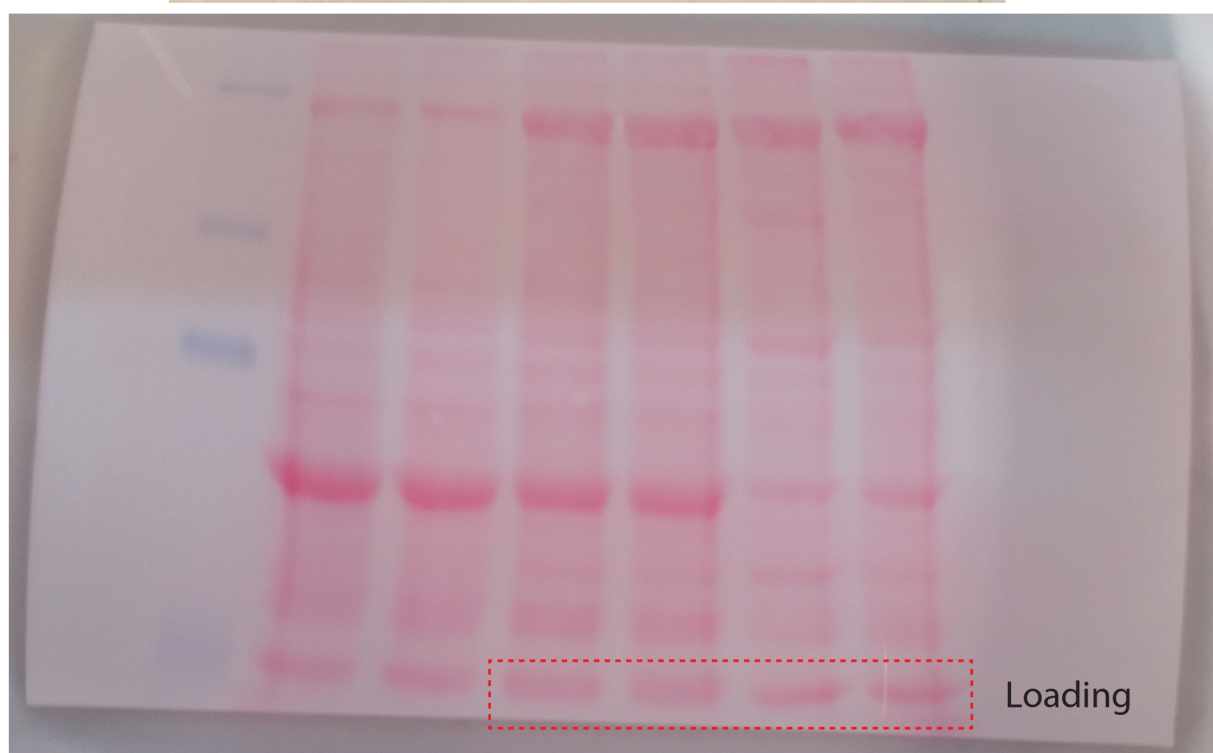

Supplement: fig5-data6 [file elife-87434-fig5-data6-v1.zip]

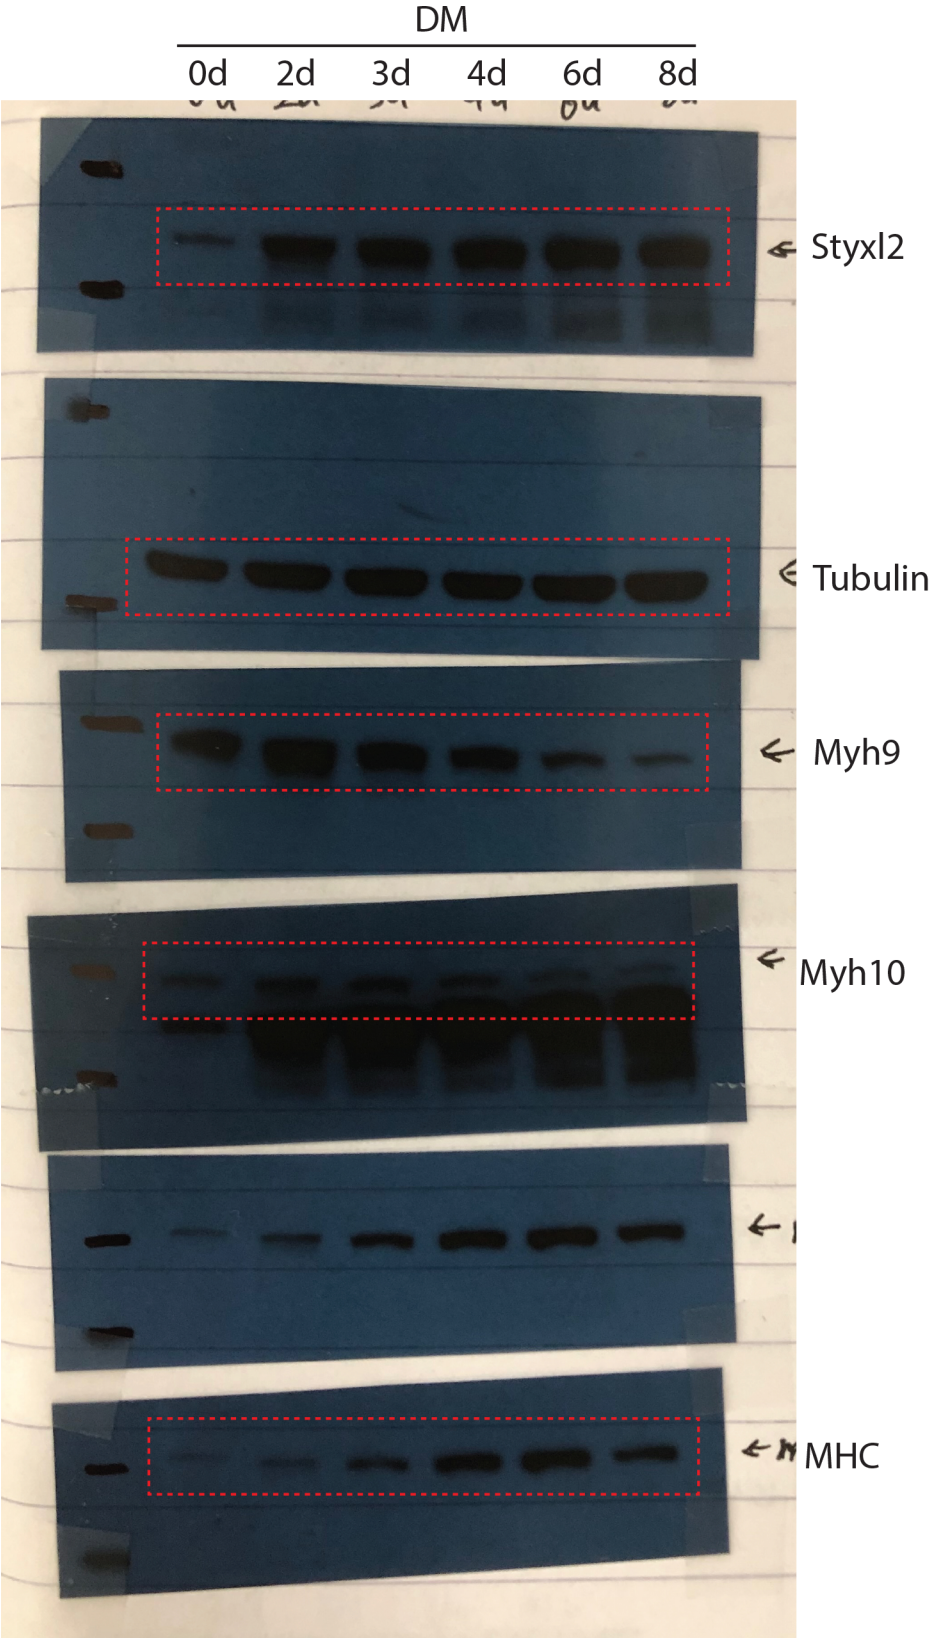

Supplement: fig5-figsupp1-data2 [file elife-87434-fig5-figsupp1-data2-v1.zip]

MO  
Myh10 Ctrl

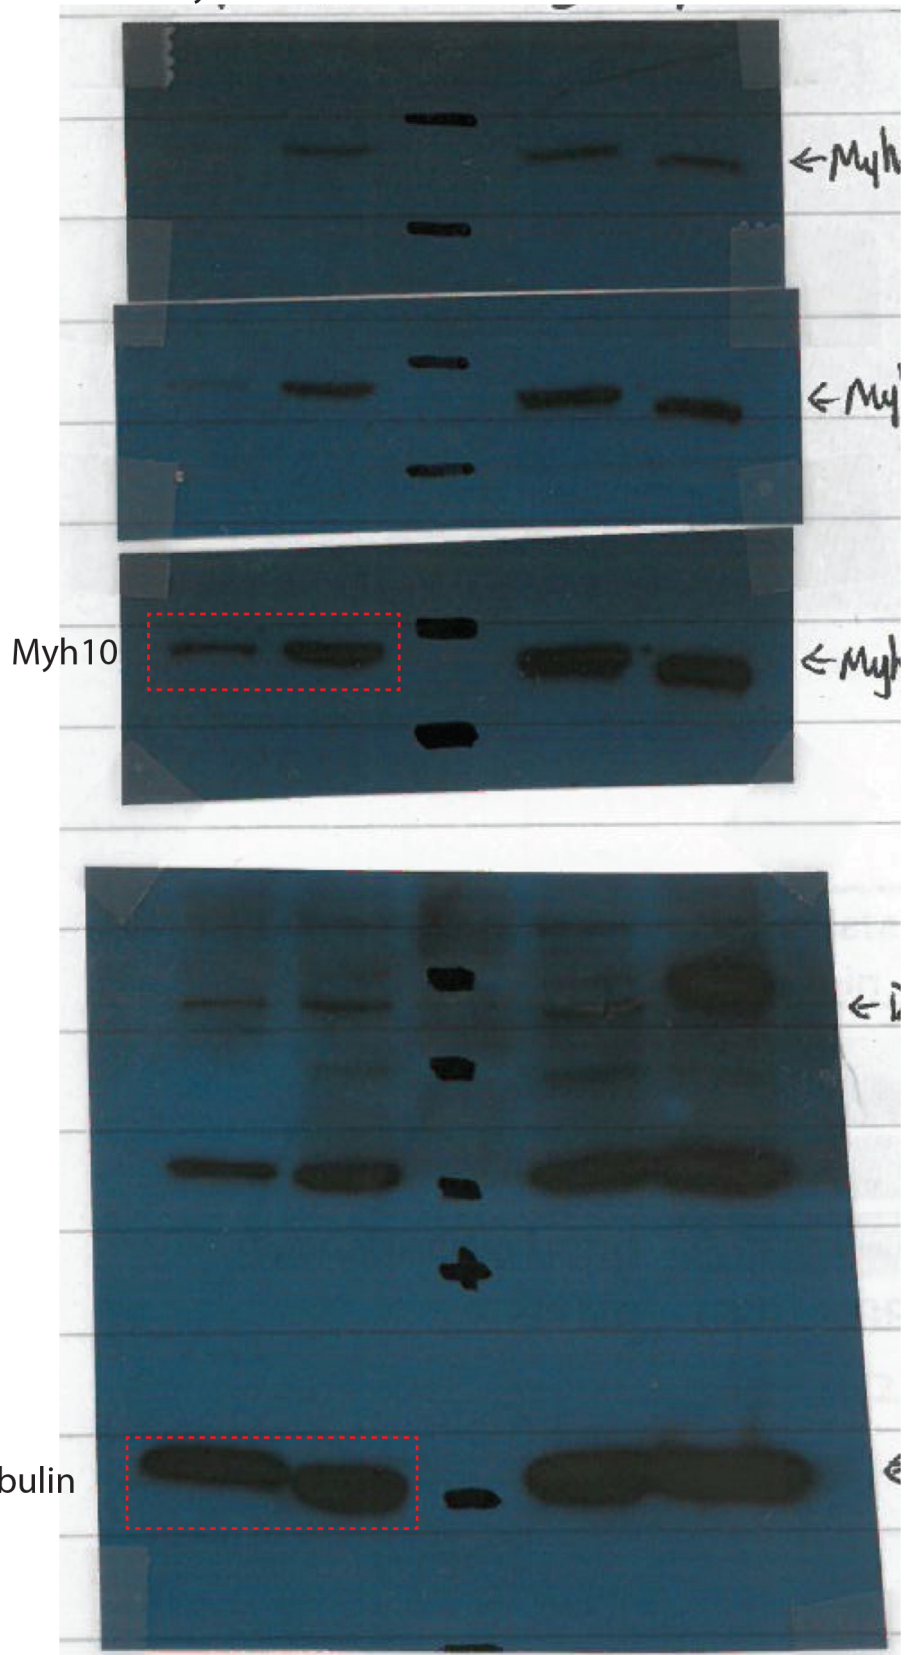

Supplement: fig5-figsupp1-data4 [file elife-87434-fig5-figsupp1-data4-v1.zip]

OE: 

|           |             |
|-----------|-------------|
| HA-Myh9   |             |
| Flag-Mst1 | Flag-Styxl2 |

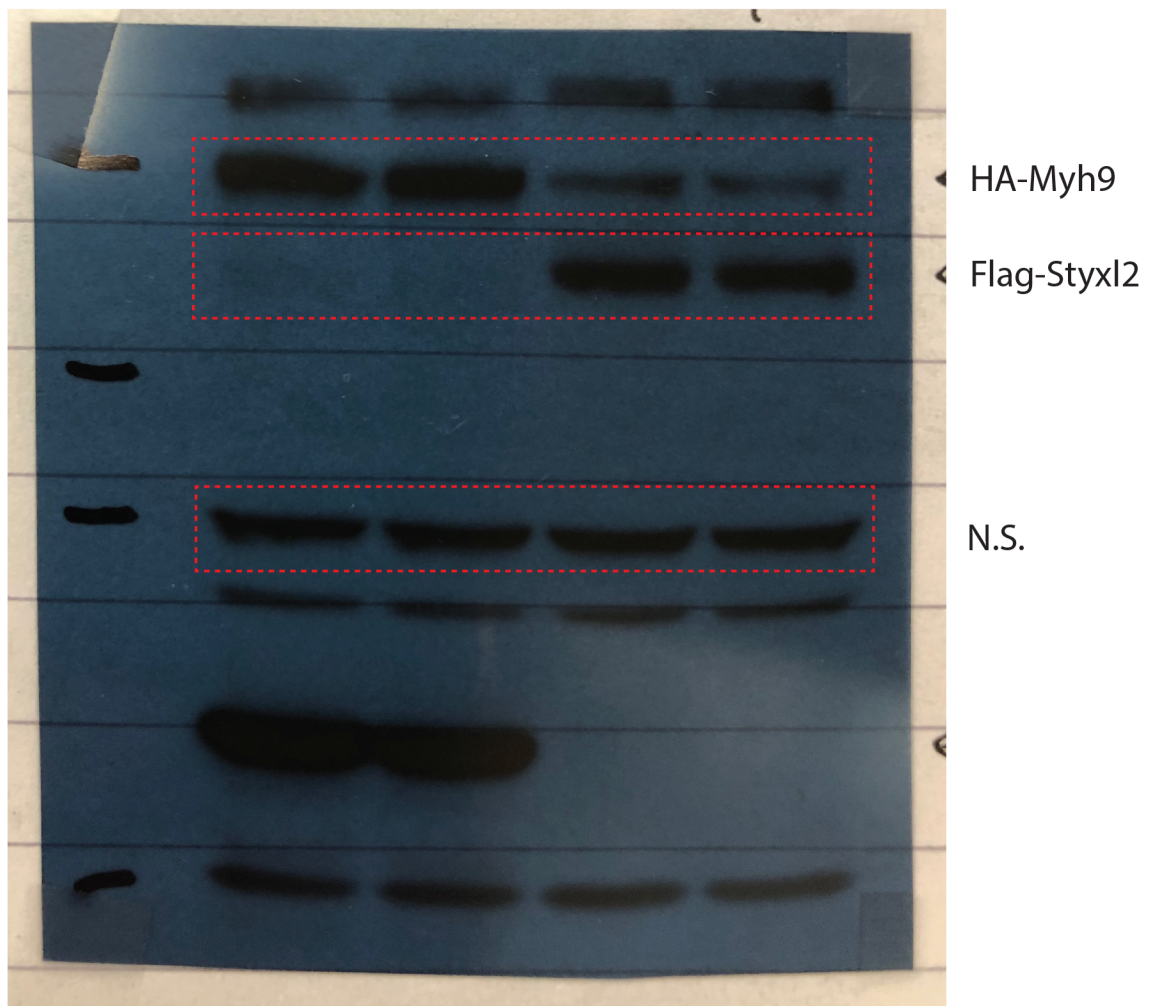

Supplement: fig6-data2 [file elife-87434-fig6-data2-v1.zip]

|                  |   |   |   |   |   |   |   |
|------------------|---|---|---|---|---|---|---|
| HA-Myh9          | + | + | + | - | - | - | - |
| HA-Myh9-head     | - | - | - | + | + | + | - |
| Flag-Styxl2ΔN509 | - | - | + | - | - | + | + |
| Flag-Styxl2N513  | - | + | - | - | + | - | - |
| Flag-Mst1        | + | - | - | + | - | - | + |

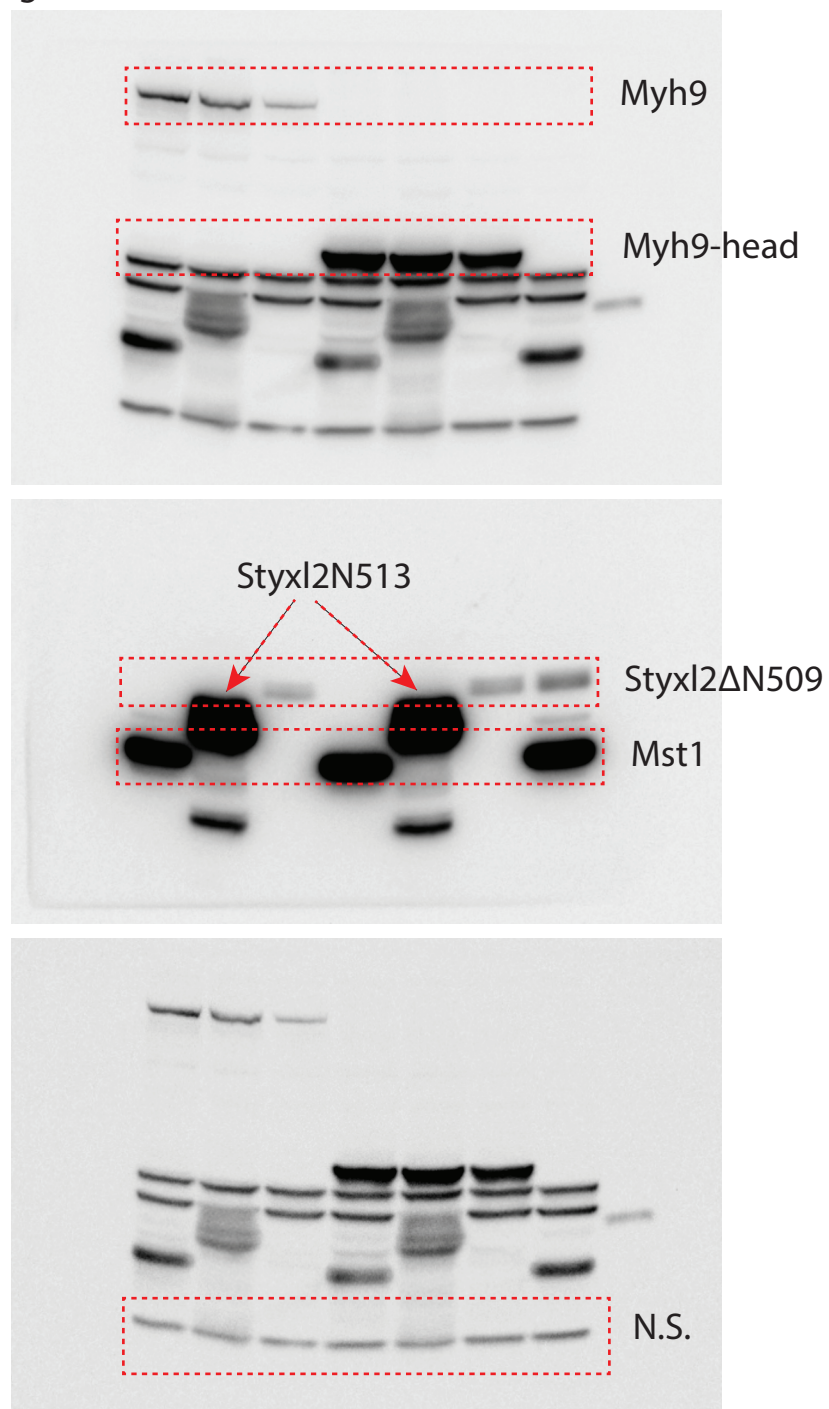

Supplement: fig6-data4 [file elife-87434-fig6-data4-v1.zip]

OE: Myh9  
Mst1 Styx12

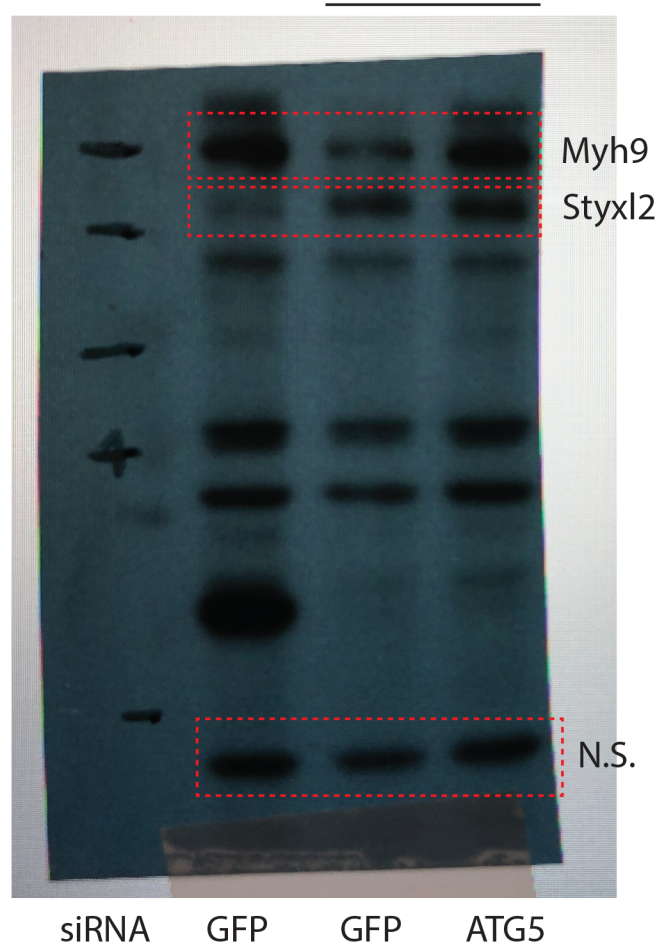

Supplement: fig7-data2 [file elife-87434-fig7-data2-v1.zip]

OE: Myh9  
Mst1 Styxl2ΔN509

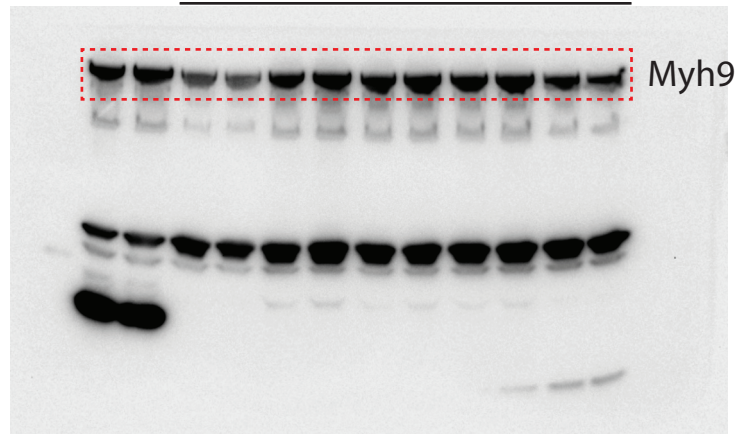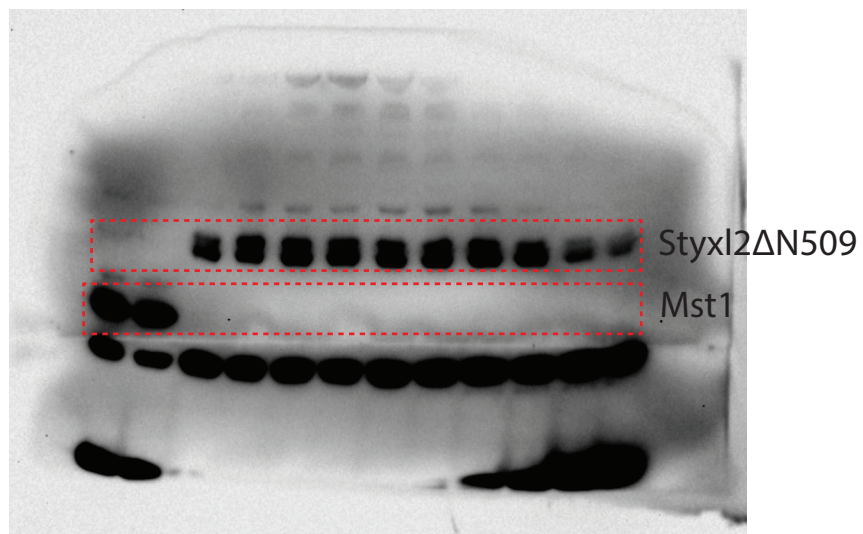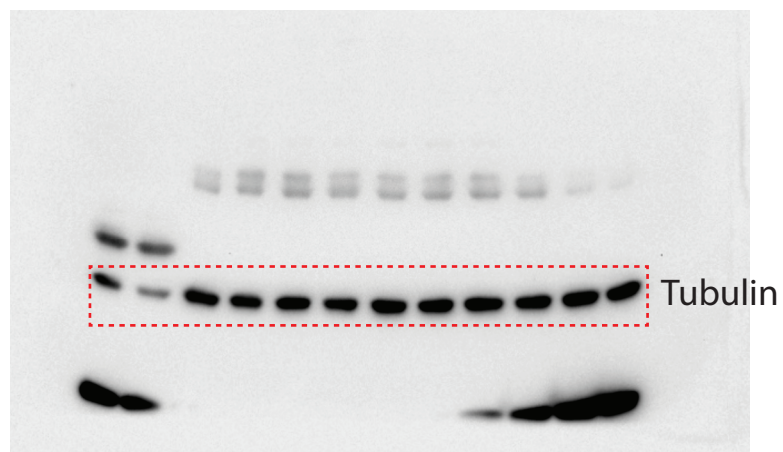

Control LY294002 Chloroquine BafA1 NH<sub>4</sub>Cl

Supplement: fig7-data4 [file elife-87434-fig7-data4-v1.zip]

|             | Input |   | IP: $\alpha$ -Myc |   |
|-------------|-------|---|-------------------|---|
| HA-Myh9     | +     | + | +                 | + |
| Myc-Ub      | +     | + | +                 | + |
| Flag-Styxl2 | -     | + | -                 | + |
| Flag-Mst1   | +     | - | +                 | - |

HA-Myh9

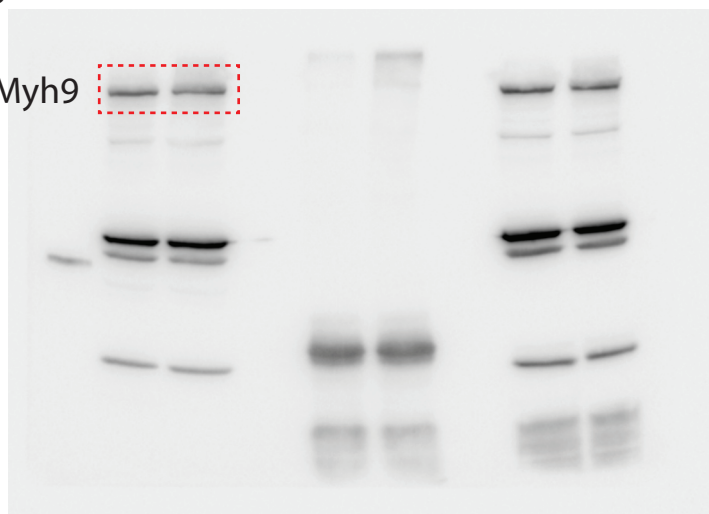

Flag-Styxl2

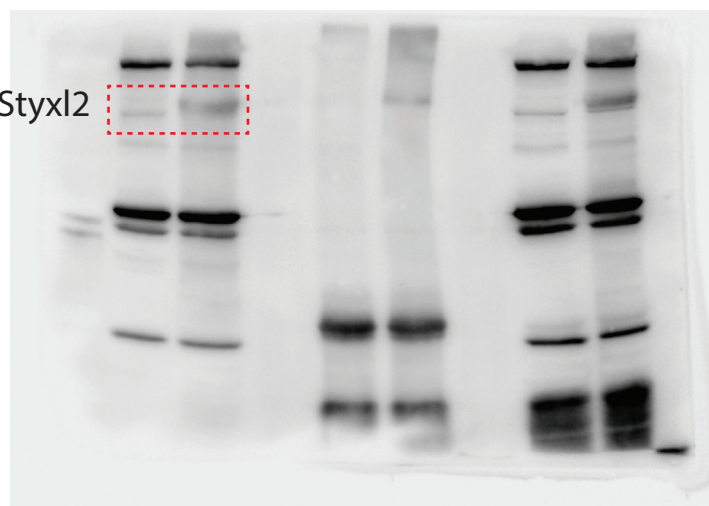

Myh9-Ub

WB:  $\alpha$ -HA

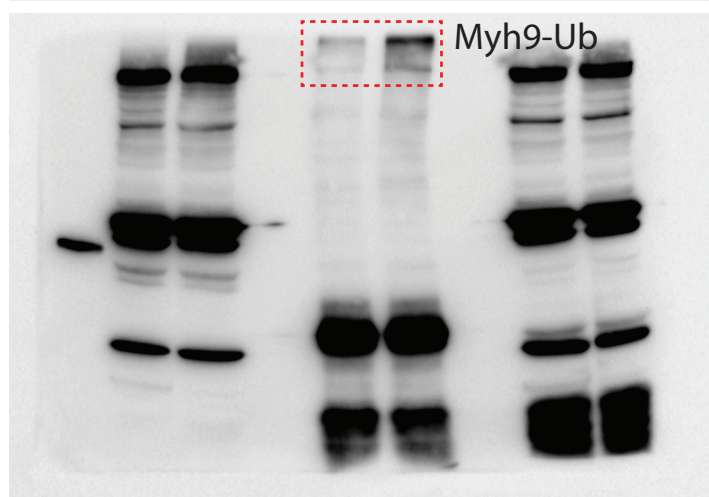

Supplement: fig7-data6 [file elife-87434-fig7-data6-v1.zip]

OE: Styxl2

| DMSO | MG132 |
|------|-------|
|------|-------|

Myh9

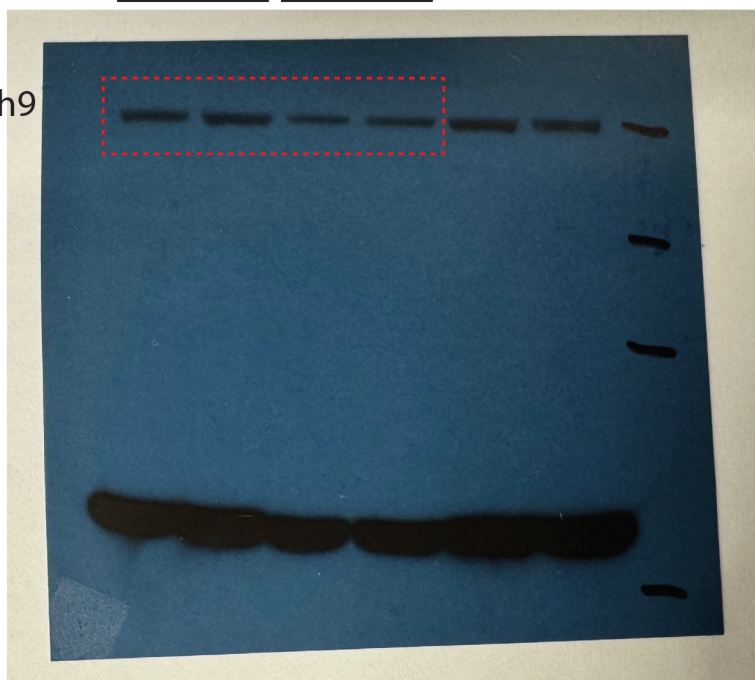

Styxl2

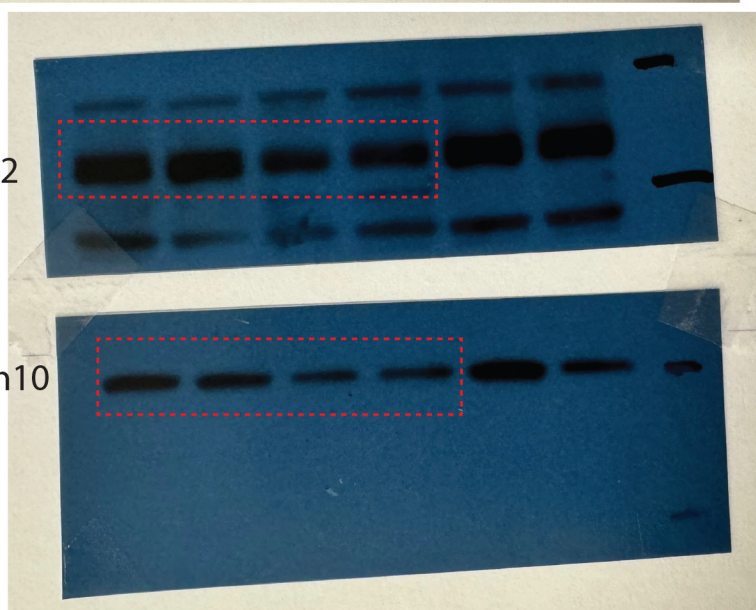

Myh10

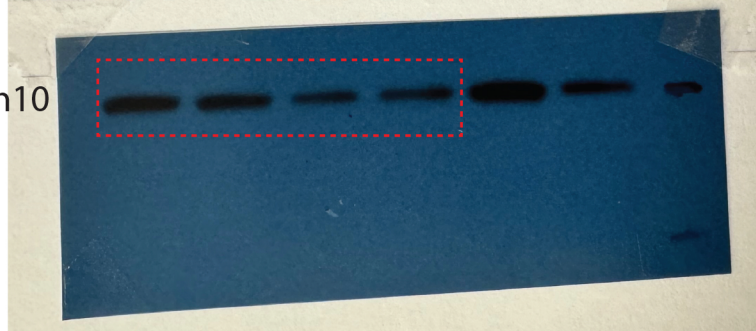

Loading

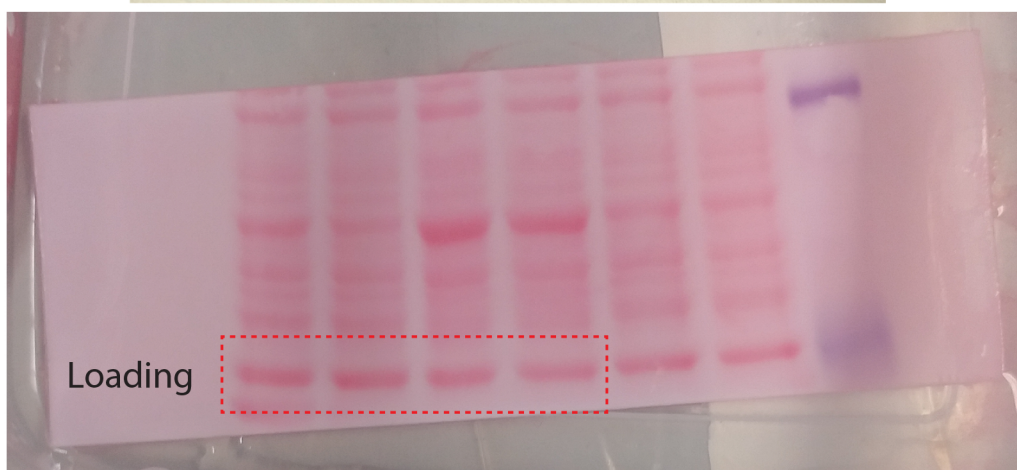

Supplement: fig7-figsupp1-data2 [file elife-87434-fig7-figsupp1-data2-v1.zip]
